# Supplementary material for: Canonical and truncated transglutaminase-2 regulate mucin-1 expression and androgen independency in prostate cancer cell lines
Source: Springer Nature journal article supplement (doi:10.1038/s41419-023-05818-9), 2023-05-09
Supplement: MOESM1 [file 41419_2023_5818_MOESM1_ESM.pdf]

## **Supplementary Information for**

**Canonical and truncated transglutaminase-2 regulate mucin-1 expression and androgen independency in prostate cancer cell lines.**

Adeola Grace Atobatele, Elisa Tonoli, Jayakumar Vadakekolathu, Maria Pia Savoca, Melissa Barr, Yukti Kataria, Marta Rossanese, Izhar Burhan, Stephanie McArdle, Daniela Caccamo and Elisabetta AM Verderio.

### **Table of content:**

- Supplementary Figures 1 to 10
- Supplementary Tables 3 to 9 (see separate files for supplementary Table 1 and 2)
- Supplementary Methods
- Supplementary References

## Supplementary Figures

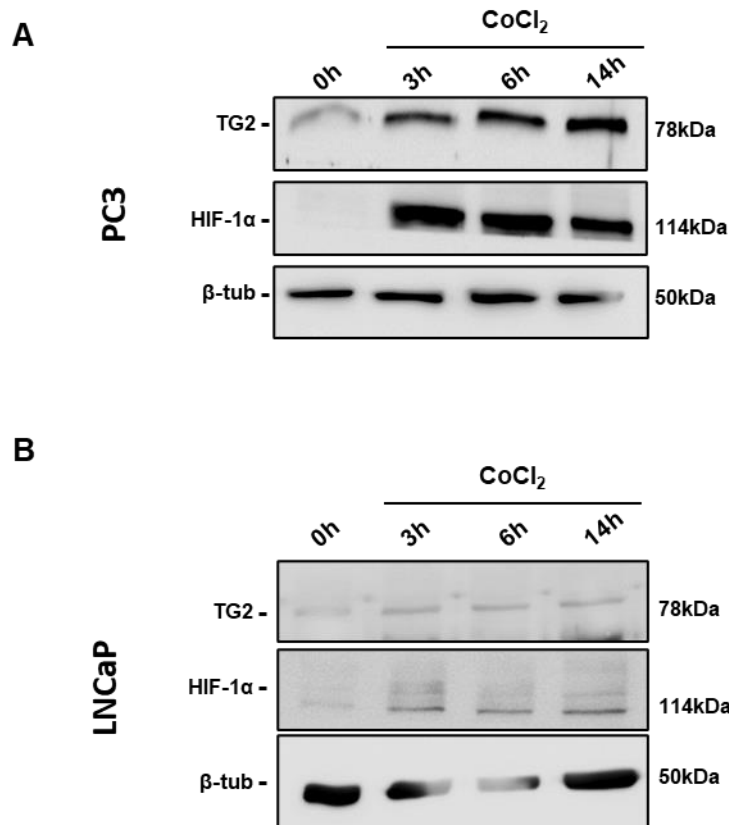

**Supplementary Figure 1. TG2 expression in chemical hypoxic conditions in PC3 and LNCaP cells.** (A, B) Immunoblot of total cell lysates from androgen insensitive (PC3) and androgen sensitive (LNCaP) metastatic cells in normoxic (37°C, 5% CO<sub>2</sub>) and chemical hypoxic (100-150  $\mu$ M CoCl<sub>2</sub>) culture conditions, probed using mouse monoclonal anti-TG2 antibody (CUB7402), mouse monoclonal anti-HIF-1 $\alpha$  and rabbit polyclonal anti- $\beta$ -tubulin, as a loading control. Immuno-reactive bands were visualised via chemiluminescence detection system as described in Figure 1 legend.

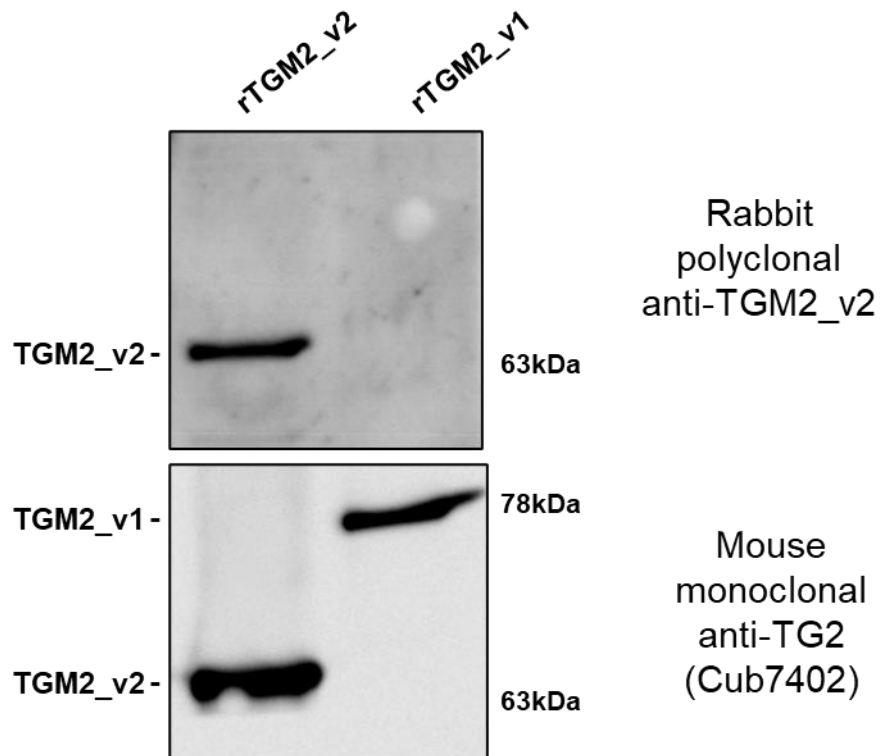

**Supplementary Figure 2. Immunoreactivity of anti-TGM2\_v2 and CUB7402 antibodies towards TG2 isoforms.** Recombinant human TG2 isoforms expressed and purified as described in (1), were immunoprobed using either custom-made rabbit polyclonal anti-TGM2\_v2 or mouse monoclonal anti-TG2 (CUB7402) antibody. Anti-TGM2\_v2 recognises the truncated TG2 isoform only, whereas CUB7402 is able to recognise both isoforms.

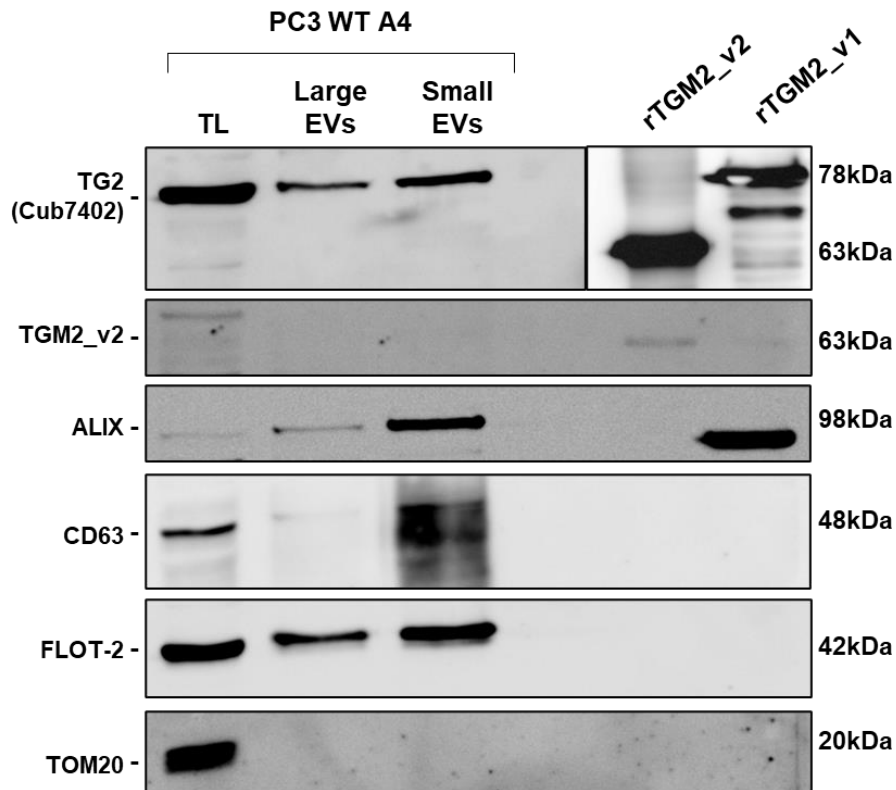

**Supplementary Figure 3. Expression of TG2 isoforms in PC3-derived EVs.** EVs were isolated from PC3 WT A4 cells (3 T75 flasks) and all material (15  $\mu$ g for large EVs, 28  $\mu$ g for small EVs and total cell lysate, TL) was loaded in a 10% polyacrylamide gel under reducing conditions and membranes probed with anti-TG2 CUB7402, anti-TGM2\_v2 antibody, EVs markers (ALIX, CD63, FLOT-2) and negative EVs marker TOM20.

**A**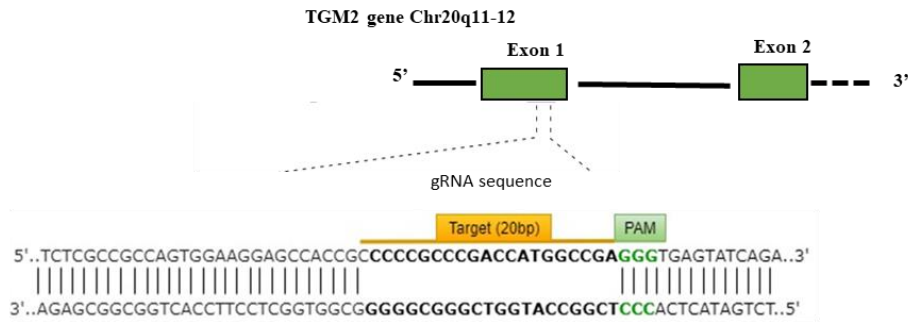**B**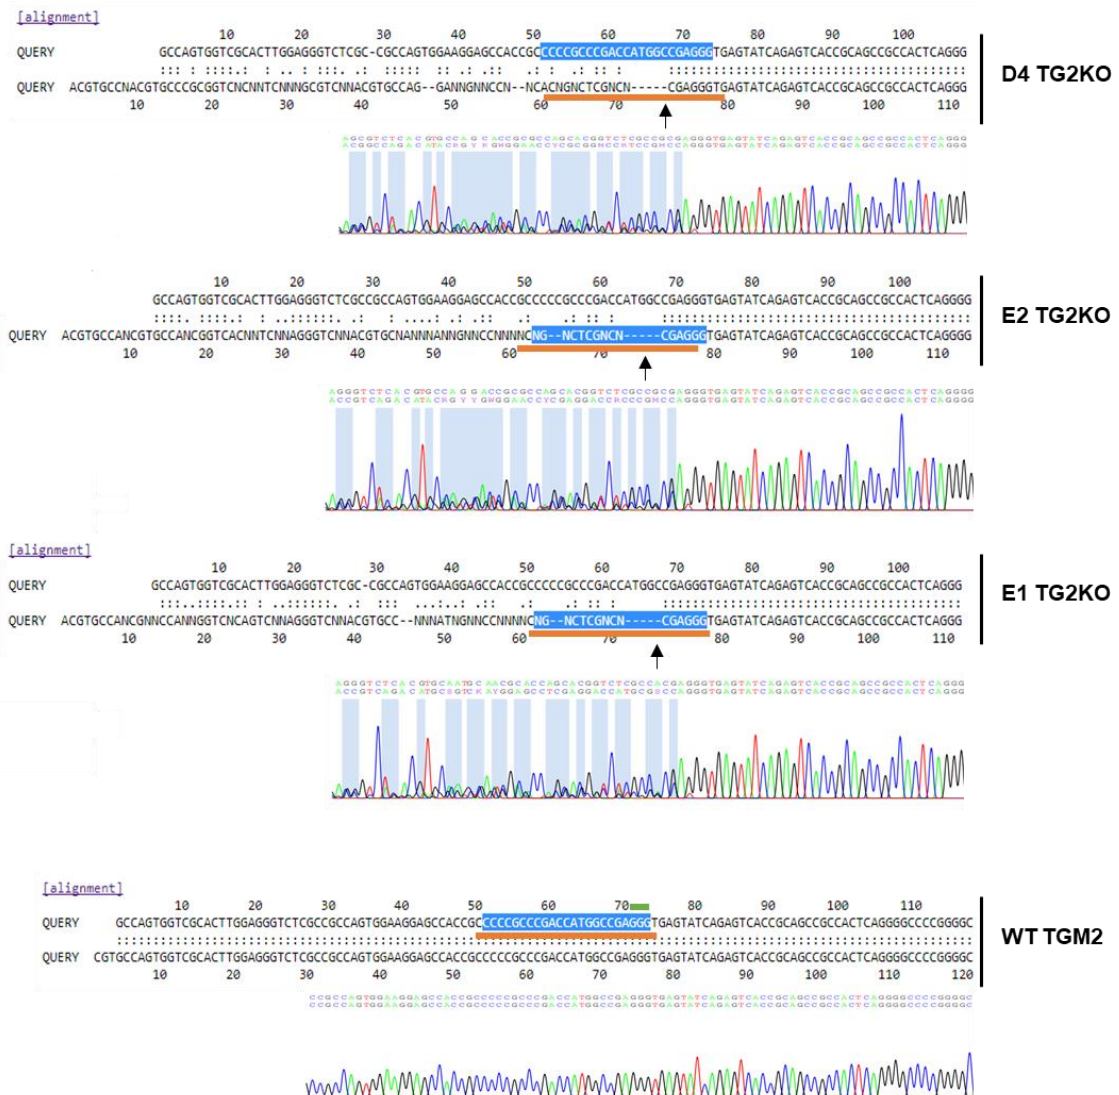

**Supplementary Figure 4. CRISPR-Cas9 gene editing of TGM2 and validation.** A) The single guide RNA (gRNA) target sequence (exon 1 of human TGM2) is highlighted followed by the protospacer adjacent motif (PAM) enabling cleavage by the CRISPR-Cas9. B) Sanger sequencing of PCR amplified TGM2 fragments encompassing the gene editing event. Sequence alignments of wild-type TGM2 (top sequence in each pair match) with the mutant

TGM2 gene sequences (bottom) isolated from the PC3 TG2KO clones (D4, E2 and E1) or wild type PC3. DNA sequencing was obtained by reverse primer 5'-CCTGGCGGACCACTGGCACGT -3'. The electropherograms (Sanger sequencing) are also shown. The black arrows point at the start of the shift in reading frame in the TG2KO clones (confirmed by western blotting, Supplementary Fig 4).

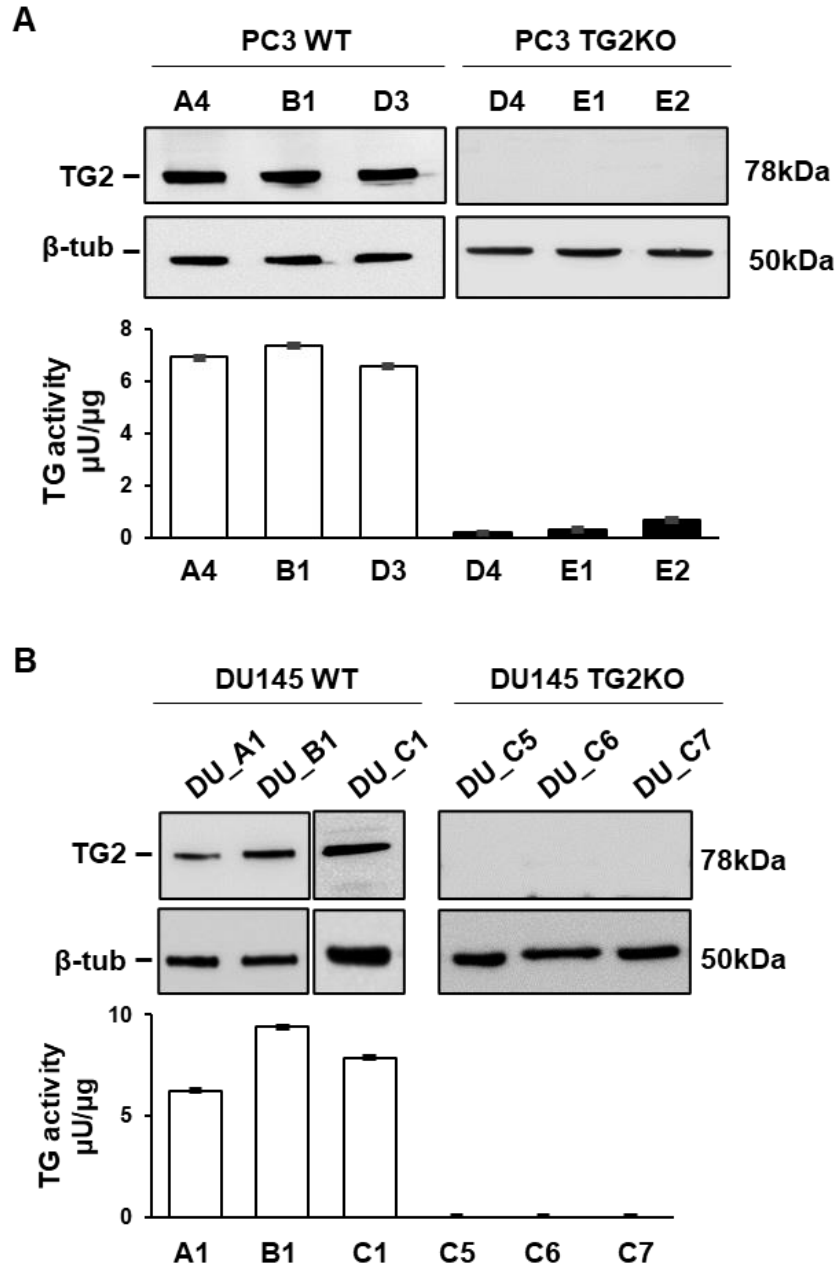

**Supplementary Figure 5. Knockout of TGM2 in metastatic androgen insensitive PCa cell lines, PC3 and DU145 by CRISPR/Cas9.** (A, B) Immunoblot showing expression of TG2 in six PC3 or six DU145 clones, following knockdown of TGM2 via CRISPR-Cas9. Proteins were separated by electrophoresis, immunoblotted and probed with either mouse monoclonal anti-transglutaminase-2 (CUB7402) or rabbit polyclonal anti- $\beta$ -tubulin. Transamidating TG activity was measured in cell lysates by detecting the incorporation of biotinylated cadaverine into fibronectin as described in the supplementary methods. Total TG activity is represented in  $\mu$ U/ $\mu$ g.

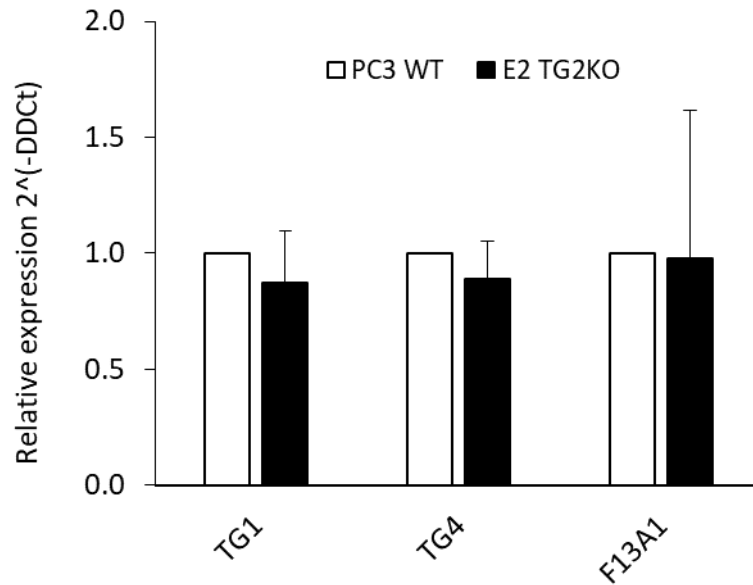

**Supplementary Figure 6. Relative expression of main TG family members in TG2KO cells (E2 clone) relative to wild type PC3 cells.** TG transcripts were amplified by qRT-PCR, using isoform-specific oligonucleotide-primers (Supplementary Table 6) and quantified by the  $2^{-\Delta\Delta C_t}$  relative method as described in the Methods according to (2). The values were normalised to the mean expression of reference genes (HPRT1). Expression in WT cells was equal to 1 ( $2^{-\Delta\Delta C_t} = 1$ ). Data are the mean  $\pm$  SEM of two independent experiments.



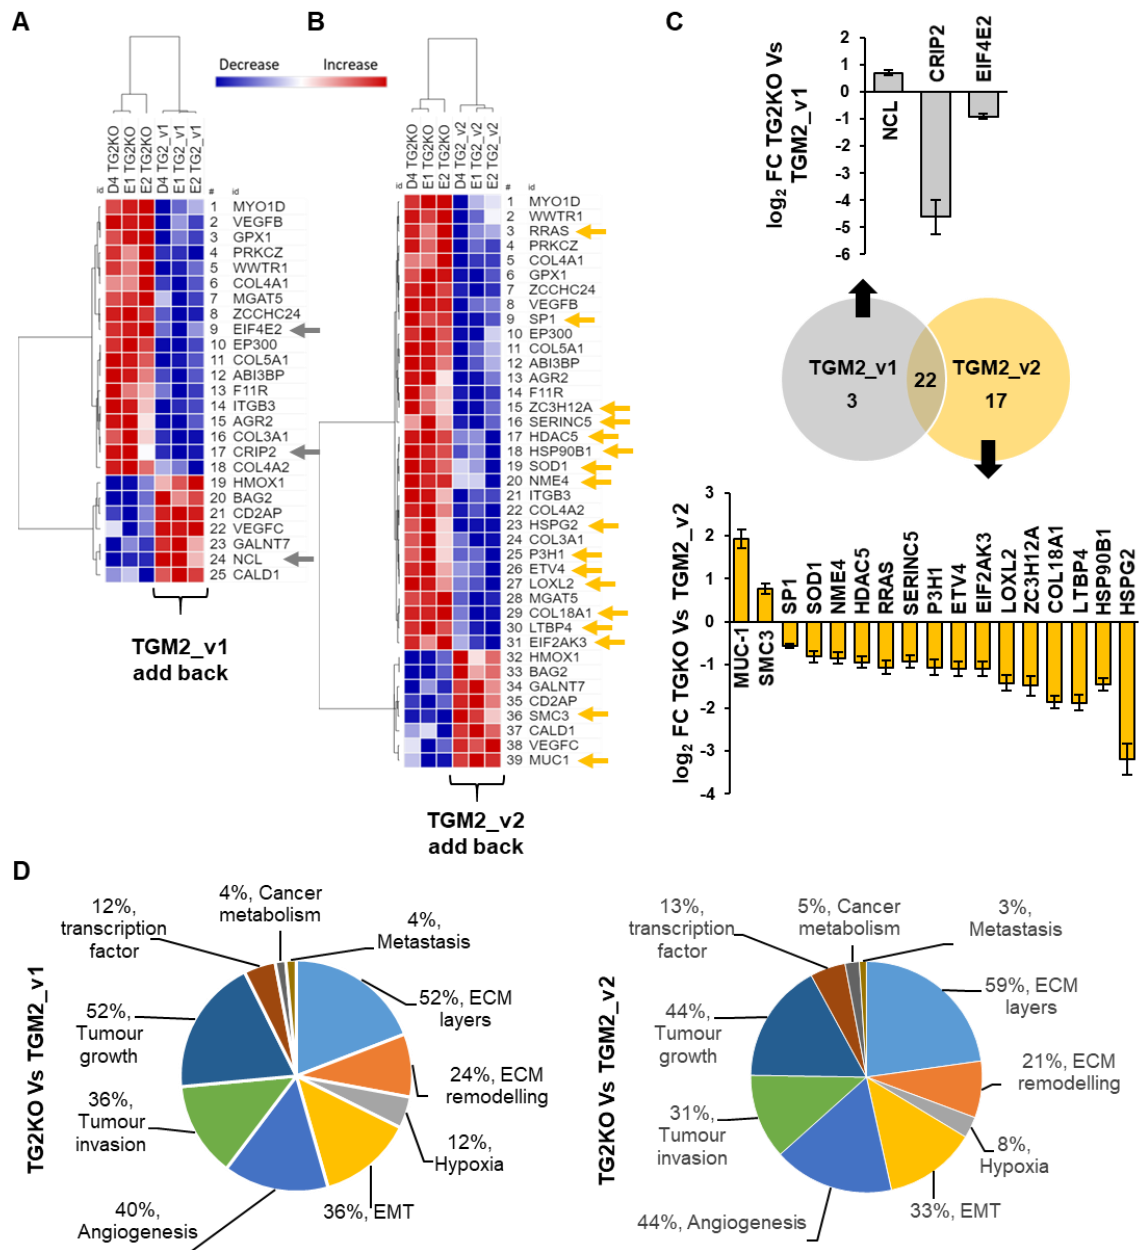

**Supplementary Figure 7. Differentially expressed cancer-related genes induced by TGM2\_v1 and/or TGM2\_v2 and cancer processes implicated.** (A, B) Heatmap displaying differentially expressed genes with its normalised mRNA log<sub>2</sub> count of each gene modulated by addback of TGM2\_v1(A) and TGM2\_v2 (B) using NanoString Cancer progression panel, data plotted using Morpheus from Broad Institute. Hierarchical clustering and One minus Pearson Correlation in rows and columns. Intense blue to less intense blue signifies range of gene underexpressed, while light red to intense red signifies range of gene overexpressed as indicated in the key. Grey arrows indicate genes that are uniquely modulated by TGM2\_v1 and yellow arrows indicate genes uniquely modulated by TGM2\_v2. (C) Venn diagram displaying common genes modulated by both TGM2 isoform, log<sub>2</sub> fold changes of these genes are

individually named in histograms. **(D)** Pie chart categorising the differentially expressed genes induced by either TGM2\_v1 and TGM2\_v2 into cancer progression categories according to NanoString Cancer progression panel. Each cancer progression category shown with the percentage of gene hit against total number of cancer progression categories.

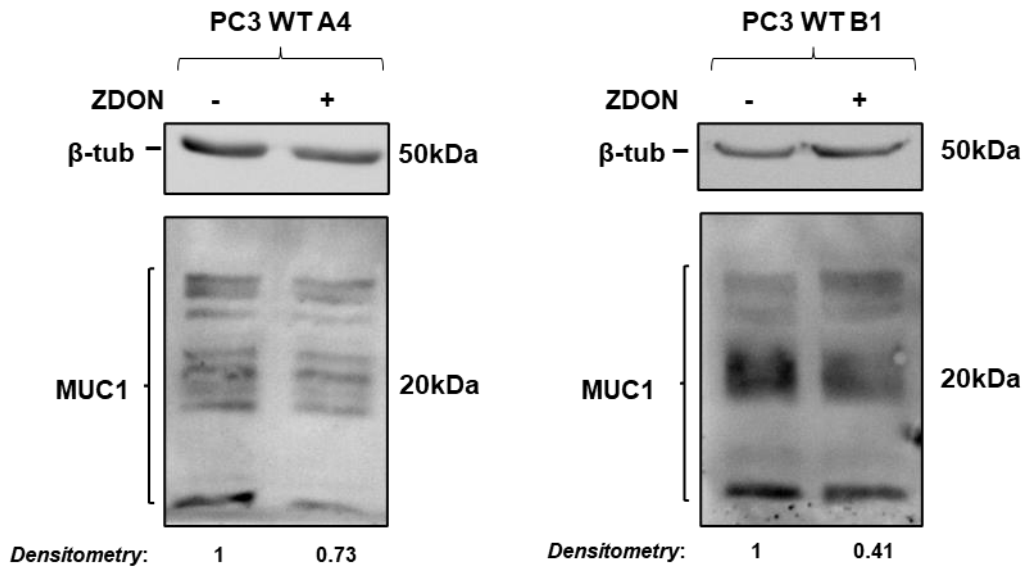

**Supplementary Figure 8. MUC1 protein level is attenuated by pharmacological inhibition of TG2.** PC3 WT cells (clones A4 and B1) were incubated with TG2 inhibitor ZDON (90  $\mu$ M) for 24 hours, lysed in RIPA buffer and equal amounts (120  $\mu$ g) analysed by western blotting in reducing conditions for detection of MUC1 and  $\beta$ -tubulin. Densitometry quantification of MUC1 bands normalised to  $\beta$ -tubulin and to untreated cells is shown. A typical experiment is shown.

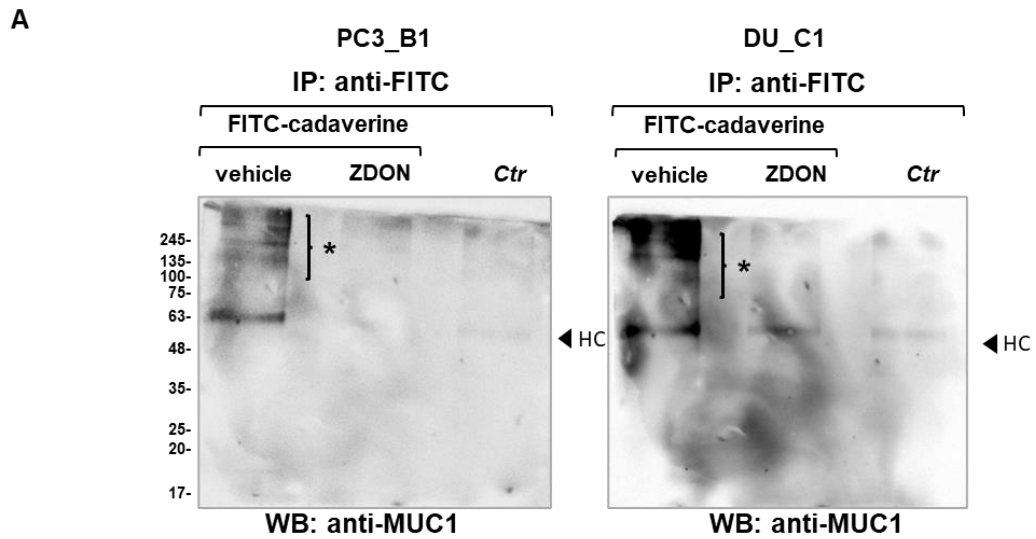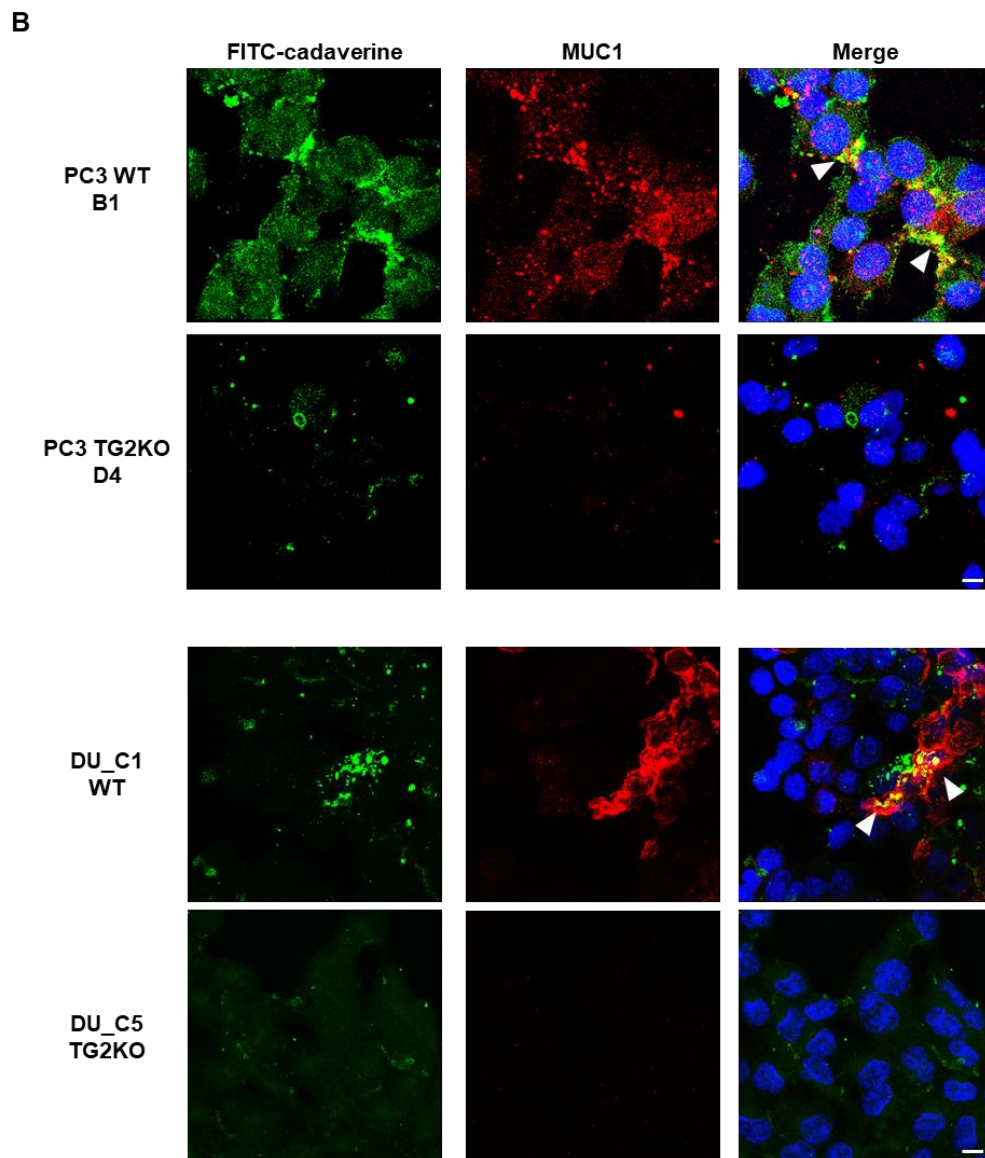

**Supplementary Figure 9. MUC1 is a target of TG2-mediated crosslinking in PC3 and DU145 cells.** A) PC3 or DU145 clonal cell lines were cultured in the presence of 0.5 mM

FITC-cadaverine for 5 h, lysed in the presence of EDTA and immunoprecipitated with mouse anti-FITC antibody (~230  $\mu$ g of lysate) to recover substrates of transglutaminase as described in (3) and in the supplementary methods. TG2-mediated transamidation was inhibited by incubation with ZDON (90  $\mu$ M). Eluted proteins were analysed by western blotting using anti-MUC1 and secondary anti-rabbit-HRP antibody. One representative blot of two independent experiments per cell line, for a total of four experiments is shown. \*: TG2-dependent MUC1 high molecular weight multimers. **B**) PC3 or DU145 clonal cell lines (WT and TG2KO) were cultured in the presence of 0.5 mM FITC-cadaverine for 15 h and fixed as previously described (4). Specimens were immunostained with anti-MUC1 antibody which was revealed by anti-rabbit AF-568 antibody. Nuclei were stained with DAPI. Specimens were imaged using fluorescence confocal microscopy (Leica SP5) using a 63X objective. Successive serial optical sections (1 $\mu$ m) were recorded over 8  $\mu$ m planes and maximum projections are shown. The white arrowheads indicate points of co-localisation between in situ TG activity (green) and MUC1 protein (red). The degree of colocalization was evaluated by Leica co-localisation software. A typical experiment is shown. Scale bar: 10  $\mu$ m.

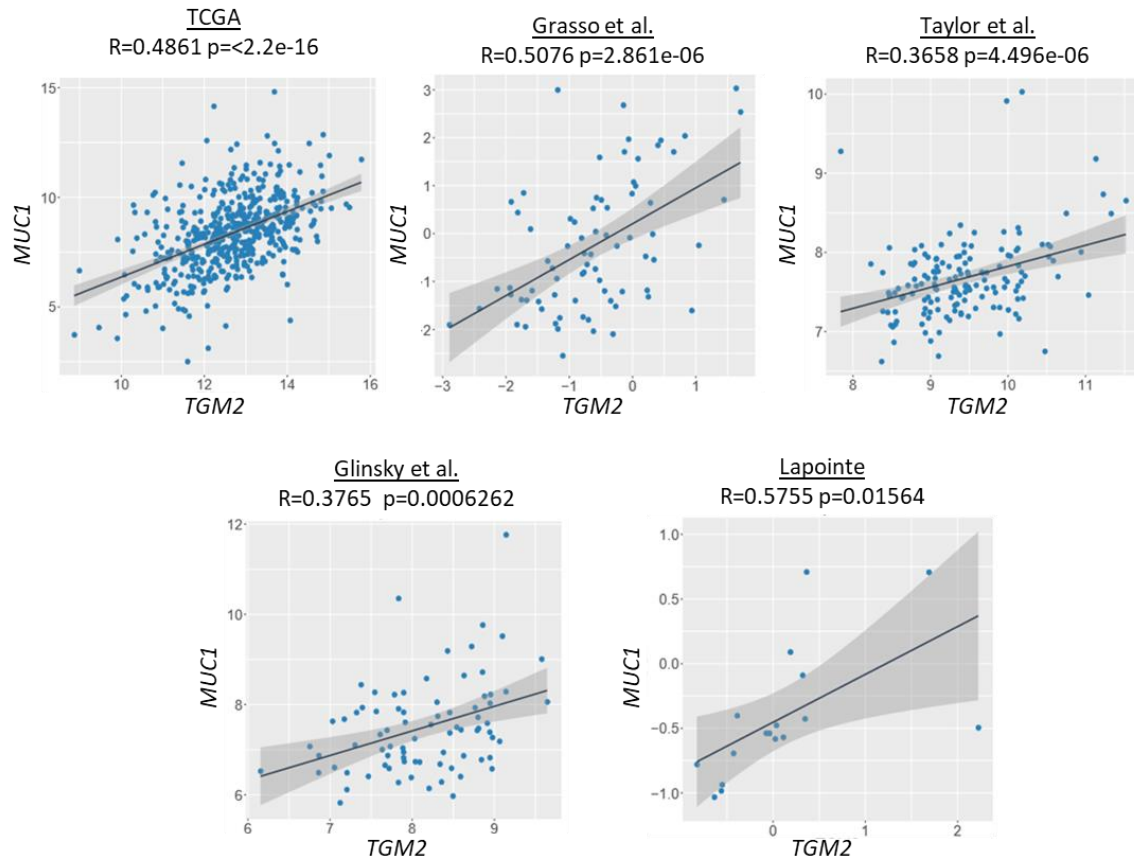

**Supplementary Figure 10. TG2 expression correlates with MUC1 expression in prostate cancer patients.** Correlation plot of TGM2 and MUC1 expression in primary and metastatic tumours from different prostate cancer databases. Size of samples for each study: Glinsky n =79, Grasso n =88, Taylor n =179, TCGA n =496 (<https://www.cancer.gov/tcga>), Lapointe n =26 (5–8). Black line represents linear regression, grey area indicates the limits of the confidence intervals and R and p indicate Pearson’s correlation coefficient and statistical significance, respectively.

## Supplementary Tables

**Supplementary Table 3. Significant differentially expressed genes in TG2KO cells (three TG2KO clones analysed) compared to WT cells (five WT clones analysed).** Genes are labelled according to the HUGO gene nomenclature. Normal p-value subjected to the Benjamini-Hochberg (BH) correction test to exclude false discovery (BH p-value  $\leq 0.05$ ). Genes are listed in the order of increased expression levels (from least expressing to highest expression genes) in TG2KO cells when compared to WT cells.

| Underexpressed genes |                                                          |                  |                    |          |            |
|----------------------|----------------------------------------------------------|------------------|--------------------|----------|------------|
| HUGO Gene ID         | Gene name                                                | Log2 fold change | Linear fold change | P-value  | BH.p.value |
| MUC-1                | Mucin-1                                                  | -1.38            | 0.384              | 0.00131  | 0.0376     |
| PLEKHO1              | Pleckstrin homology domain containing, family O member 1 | -0.847           | 0.556              | 3.02E-05 | 0.0148     |

| Overexpressed genes |                                                                             |                  |                    |          |            |
|---------------------|-----------------------------------------------------------------------------|------------------|--------------------|----------|------------|
| HUGO Gene ID        | Gene name                                                                   | Log2 fold change | Linear fold change | P-value  | BH.p.value |
| RPS6KB1             | Ribosomal protein S6 kinase, 70kDa, polypeptide 1                           | 0.429            | 1.35               | 0.000206 | 0.0187     |
| SMURF2              | SMAD specific E3 ubiquitin protein ligase 2                                 | 0.554            | 1.47               | 0.00206  | 0.0529     |
| DLG1                | Discs, large homolog 1                                                      | 0.685            | 1.61               | 0.00188  | 0.0509     |
| NF2                 | Neurofibromin 2                                                             | 0.687            | 1.61               | 0.0024   | 0.0535     |
| PDK1                | Pyruvate dehydrogenase kinase, isozyme 1                                    | 0.707            | 1.63               | 0.000552 | 0.0208     |
| ENO2                | Enolase 2                                                                   | 0.888            | 1.85               | 0.00228  | 0.0535     |
| PIK3CA              | Phosphatidylinositol-4,5-bisphosphate 3-kinase, catalytic subunit alpha     | 0.908            | 1.88               | 0.000314 | 0.0192     |
| PGK1                | Phosphoglycerate kinase 1                                                   | 0.939            | 1.92               | 0.000151 | 0.0186     |
| BTG1                | B-cell translocation gene 1                                                 | 0.97             | 1.96               | 0.000152 | 0.0186     |
| FGFR1               | Fibroblast growth factor receptor 1                                         | 0.997            | 2                  | 0.000495 | 0.0202     |
| EIF4E2              | Eukaryotic translation initiation factor 4E family member 2                 | 1.05             | 2.08               | 0.000409 | 0.02       |
| MMP14               | Matrix metalloproteinase 14                                                 | 1.16             | 2.23               | 0.000304 | 0.0192     |
| ITGA3               | Integrin, alpha 3                                                           | 1.25             | 2.38               | 0.00023  | 0.0187     |
| HSP90B1             | Heat shock protein 90kDa beta (Grp94), member 1                             | 1.34             | 2.54               | 0.00109  | 0.0354     |
| MGAT5               | Mannosyl (alpha-1,6-)-glycoprotein beta-1,6-N-acetylglucosaminyltransferase | 1.48             | 2.79               | 0.00116  | 0.0354     |
| ABI3BP              | ABI family, member 3 (NESH) binding protein                                 | 1.55             | 2.93               | 0.000456 | 0.0202     |
| ITGA5               | Integrin, alpha 5                                                           | 2                | 3.99               | 0.000979 | 0.0342     |
| EPHB3               | EPH receptor B3                                                             | 2.06             | 4.17               | 8.30E-05 | 0.0186     |
| ANGPTL4             | Angiopoietin-like 4                                                         | 2.22             | 4.67               | 0.000356 | 0.0194     |
| COL6A3              | Collagen, type VI, alpha 3                                                  | 2.54             | 5.83               | 0.00235  | 0.0535     |

**Supplementary Table 4. Differentially expressed genes in TGM2\_v1 knock-in PC3 cells compared to TG2KO cells (three TG2KO clones analysed) with BH p-value  $\leq$  0.05.** Normal p-value obtained was subjected to the Benjamini-Hochberg (BH) correction test to exclude false discovery rate (BH p-value  $\leq$  0.05). Genes are listed in the order of increased expression levels (from least expressing to highest expression genes) in TGM2\_v1 cells when compared to TG2KO cells.

| <b>DIFFERENTIALLY EXPRESSED GENES IN TGM2_v1 Vs TG2KO</b> |                     |                                                                                                |                         |                           |                |                   |
|-----------------------------------------------------------|---------------------|------------------------------------------------------------------------------------------------|-------------------------|---------------------------|----------------|-------------------|
|                                                           | <b>HUGO Gene ID</b> | <b>Gene name</b>                                                                               | <b>Log2 fold change</b> | <b>Linear fold change</b> | <b>P-value</b> | <b>BH.p.value</b> |
| <b>Underexpressed genes</b>                               | WWTR1               | WW domain containing transcription regulator 1                                                 | -0.78                   | 0.582                     | 0.00109        | 0.0434            |
|                                                           | PRKCZ               | Protein kinase C, zeta                                                                         | -0.829                  | 0.563                     | 0.000939       | 0.0434            |
|                                                           | MYO1D               | Myosin ID                                                                                      | -0.912                  | 0.532                     | 0.00247        | 0.0496            |
|                                                           | EP300               | E1A binding protein p300                                                                       | -0.919                  | 0.529                     | 0.000109       | 0.0326            |
|                                                           | VEGFB               | Vascular endothelial growth factor B                                                           | -1.01                   | 0.497                     | 0.000688       | 0.0434            |
|                                                           | GPX1                | Glutathione peroxidase 1                                                                       | -1.07                   | 0.475                     | 0.000629       | 0.0434            |
|                                                           | COL5A1              | Collagen, type V, alpha 1                                                                      | -1.37                   | 0.387                     | 0.000291       | 0.0417            |
|                                                           | F11R                | F11 receptor                                                                                   | -1.37                   | 0.386                     | 0.00239        | 0.0496            |
|                                                           | ABI3BP              | ABI family, member 3 (NESH) binding protein                                                    | -1.41                   | 0.378                     | 0.000431       | 0.0417            |
|                                                           | ZCCHC24             | Zinc finger, CCHC domain containing 24                                                         | -1.8                    | 0.288                     | 0.000135       | 0.0326            |
|                                                           | ITGB3               | Integrin, beta 3                                                                               | -1.86                   | 0.275                     | 0.00161        | 0.0493            |
|                                                           | COL4A2              | Collagen, type IV, alpha 2                                                                     | -2                      | 0.249                     | 0.00185        | 0.0493            |
|                                                           | COL4A1              | Collagen, type IV, alpha 1                                                                     | -2.08                   | 0.236                     | 0.00117        | 0.0434            |
|                                                           | MGAT5               | Mannosyl (alpha-1,6-)-glycoprotein beta-1,6-N-acetylglucosaminyltransferase                    | -2.29                   | 0.205                     | 0.00183        | 0.0493            |
|                                                           | AGR2                | Anterior gradient 2 homolog                                                                    | -4.25                   | 0.0526                    | 0.00185        | 0.0493            |
|                                                           | COL3A1              | Collagen, type III, alpha 1                                                                    | -6.47                   | 0.0113                    | 0.000834       | 0.0434            |
|                                                           | CRIP2               | Cysteine-rich protein 2                                                                        | -4.62                   | 0.0405                    | 0.00194        | 0.0493            |
|                                                           | EIF4E2              | Eukaryotic translation initiation factor 4E family member 2                                    | -0.903                  | 0.535                     | 0.00104        | 0.0434            |
| <b>Overexpressed genes</b>                                | HMOX1               | Heme Oxygenase 1                                                                               | 2.03                    | 4.07                      | 0.00256        | 0.0496            |
|                                                           | BAG2                | BCL2-associated athanogene 2                                                                   | 1.48                    | 2.79                      | 0.000882       | 0.0434            |
|                                                           | GALNT7              | UDP-N-acetyl-alpha-D-galactosamine:polypeptide N-acetylgalactosaminyltransferase 7 (GalNAc-T7) | 1.29                    | 2.45                      | 0.00204        | 0.0493            |
|                                                           | VEGFC               | Vascular endothelial growth factor C                                                           | 1.09                    | 2.12                      | 0.00184        | 0.0493            |
|                                                           | CD2AP               | CD2-associated protein                                                                         | 0.866                   | 1.82                      | 0.000424       | 0.0417            |
|                                                           | CALD1               | Caldesmon 1                                                                                    | 0.862                   | 1.82                      | 0.00245        | 0.0496            |
|                                                           | NCL                 | NCL- nucleolin                                                                                 | 0.708                   | 1.63                      | 0.00251        | 0.0496            |



**Supplementary Table 5. Differentially expressed genes in TGM2\_v2 knock-in PC3 cells compared to TG2KO cells (three TG2KO clones analysed) with BH p-value  $\leq$  0.05.** Normal p-value obtained was subjected to the Benjamini-Hochberg (BH) correction test to exclude false discovery rate (BH p-value  $\leq$  0.05). Genes are listed in the order of increased expression levels (from least expressing to highest expression genes) in TGM2\_v2 cells when compared to TG2KO cells.

| DIFFERENTIALLY EXPRESSED GENES IN TGM2_v2 Vs TG2KO |                                                                                                |                                                                             |                  |                    |          |            |
|----------------------------------------------------|------------------------------------------------------------------------------------------------|-----------------------------------------------------------------------------|------------------|--------------------|----------|------------|
|                                                    | HUGO Gene ID                                                                                   | Gene Symbol and name                                                        | Log2 fold change | Linear fold change | P-value  | BH.p.value |
| Underexpressed genes                               | SP1                                                                                            | Sp1 transcription factor                                                    | -0.567           | 0.675              | 0.000192 | 0.0239     |
|                                                    | SOD1                                                                                           | Superoxide dismutase 1, soluble                                             | -0.812           | 0.57               | 0.00389  | 0.0524     |
|                                                    | NME4                                                                                           | NME/NM23 nucleoside diphosphate kinase 4                                    | -0.84            | 0.559              | 0.00406  | 0.0533     |
|                                                    | ZC3H12A                                                                                        | Zinc finger CCCH-type containing 12A                                        | -1.49            | 0.357              | 0.00329  | 0.0498     |
|                                                    | SERINC5                                                                                        | Serine incorporator 5                                                       | -0.921           | 0.528              | 0.00323  | 0.0498     |
|                                                    | HDAC5                                                                                          | Histone deacetylase 5                                                       | -0.939           | 0.522              | 0.00186  | 0.0441     |
|                                                    | LTBP4                                                                                          | Latent transforming growth factor beta binding protein 4                    | -1.88            | 0.272              | 0.00059  | 0.03       |
|                                                    | COL18A1                                                                                        | Collagen, type XVIII, alpha 1                                               | -1.87            | 0.273              | 0.000173 | 0.0239     |
|                                                    | P3H1                                                                                           | Prolyl 3-hydroxylase 1 (P3H1)                                               | -1.06            | 0.479              | 0.00374  | 0.0524     |
|                                                    | RRAS                                                                                           | Related RAS viral (r-ras) oncogene homolog                                  | -1.06            | 0.479              | 0.00271  | 0.0494     |
|                                                    | ETV4                                                                                           | Ets variant 4                                                               | -1.09            | 0.47               | 0.00314  | 0.0498     |
|                                                    | EIF2AK3                                                                                        | Eukaryotic translation initiation factor 2-alpha kinase 3                   | -1.1             | 0.468              | 0.00267  | 0.0494     |
|                                                    | LOXL2                                                                                          | Lysyl oxidase-like 2                                                        | -1.42            | 0.374              | 0.00145  | 0.0402     |
|                                                    | HSPG2                                                                                          | Heparan sulfate proteoglycan 2                                              | -3.19            | 0.109              | 0.000981 | 0.035      |
|                                                    | HSP90B1                                                                                        | Heat shock protein 90kDa beta (Grp94), member 1                             | -1.46            | 0.362              | 0.000443 | 0.03       |
|                                                    | ABI3BP                                                                                         | ABI family, member 3 (NESH) binding protein                                 | -1.47            | 0.36               | 0.00201  | 0.0457     |
|                                                    | F11R                                                                                           | F11 receptor                                                                | -1.47            | 0.36               | 0.00141  | 0.0402     |
|                                                    | ZCCHC24                                                                                        | Zinc finger, CCHC domain containing 24                                      | -1.9             | 0.267              | 3.98E-05 | 0.0198     |
|                                                    | ITGB3                                                                                          | Integrin, beta 3                                                            | -2.04            | 0.243              | 0.00174  | 0.0435     |
|                                                    | COL4A2                                                                                         | Collagen, type IV, alpha 2                                                  | -2.21            | 0.216              | 0.000407 | 0.03       |
|                                                    | COL4A1                                                                                         | Collagen, type IV, alpha 1                                                  | -2.23            | 0.213              | 0.000601 | 0.03       |
|                                                    | VEGFB                                                                                          | Vascular endothelial growth factor B                                        | -0.896           | 0.537              | 0.000538 | 0.03       |
|                                                    | EP300                                                                                          | E1A binding protein p300                                                    | -0.967           | 0.512              | 0.0027   | 0.0494     |
|                                                    | WWTR1                                                                                          | WW domain containing transcription regulator 1                              | -0.924           | 0.527              | 0.00381  | 0.0524     |
|                                                    | COL5A1                                                                                         | Collagen, type V, alpha 1                                                   | -1.43            | 0.372              | 0.00137  | 0.0402     |
|                                                    | GPX1                                                                                           | Glutathione peroxidase 1                                                    | -0.994           | 0.502              | 0.00025  | 0.025      |
|                                                    | MGAT5                                                                                          | Mannosyl (alpha-1,6-)-glycoprotein beta-1,6-N-acetylglucosaminyltransferase | -2.48            | 0.179              | 0.00011  | 0.0239     |
|                                                    | PRKCZ                                                                                          | Protein kinase C, zeta                                                      | -0.883           | 0.542              | 0.000804 | 0.035      |
|                                                    | AGR2                                                                                           | Anterior gradient 2 homolog                                                 | -4.18            | 0.0552             | 0.00277  | 0.0494     |
|                                                    | COL3A1                                                                                         | Collagen, type III, alpha 1                                                 | -5.7             | 0.0192             | 0.00254  | 0.0494     |
|                                                    | MYO1D                                                                                          | Myosin ID                                                                   | -0.858           | 0.552              | 0.00361  | 0.0524     |
|                                                    | HMOX1                                                                                          | Heme Oxygenase 1                                                            | 2.32             | 4.98               | 0.00305  | 0.0498     |
|                                                    | BAG2                                                                                           | BCL2-associated athanogene 2                                                | 1.51             | 2.84               | 0.00112  | 0.0374     |
| GALNT7                                             | UDP-N-acetyl-alpha-D-galactosamine:polypeptide N-acetylgalactosaminyltransferase 7 (GalNAc-T7) | 1.22                                                                        | 2.33             | 0.00163            | 0.0428   |            |
| VEGFC                                              | Vascular endothelial growth factor C                                                           | 0.982                                                                       | 1.97             | 0.00314            | 0.0498   |            |
| CALD1                                              | Caldesmon 1                                                                                    | 0.862                                                                       | 1.82             | 0.00421            | 0.0539   |            |
| CD2AP                                              | CD2-associated protein                                                                         | 0.773                                                                       | 1.71             | 0.000976           | 0.035    |            |
| SMC3                                               | Structural maintenance of chromosomes 3                                                        | 0.766                                                                       | 1.7              | 0.00237            | 0.0494   |            |
| MUC1                                               | Mucin 1                                                                                        | 1.92                                                                        | 3.78             | 0.000881           | 0.035    |            |

**Supplementary Table 6. Primers used in this study.**

| <b>Primer name</b> | <b>Primer sequence (5' - 3')</b> | <b>Product size(bp)</b> |
|--------------------|----------------------------------|-------------------------|
| TGM2_v1 FW         | CCTTACGGAGTCCAACCTCA             | 245                     |
| TGM2_v1 RV         | CCGTCTTCTGCTCCTCAGTC             |                         |
| TGM2_v2 FW         | ACCGCTGAGGAGTACGTCTG             | 153                     |
| TGM2_v2 RV         | TCAACAAATGCTCCAGGAA              |                         |
| AR FW              | TTGGATGGCTCCAAATCAC              | 148                     |
| AR RV              | GCAATGATACGATCGAGTTCC            |                         |
| HPRT FW            | TGACACTGGCAAAACAATGCA            | 94                      |
| HPRT RV            | GGTCCTTTTCACCAGCAAGCT            |                         |
| TBP FW             | TGCACAGGAGCCAAGAGTGAA            | 132                     |
| TBP RV             | CACATCACAGCTCCCCACCA             |                         |
| B-ACT FW           | TTGTTACAGGAAGTCCCTTGCC           | 101                     |
| B-ACT RV           | ATGCTATCACCTCCCCTGTGTG           |                         |
| KRT13 FW           | AGGACGCCAAGATGATTGGTT            | 70                      |
| KRT13 RV           | GTGGTAACAGAGGTGCTACGG            |                         |
| PCA3 FW            | AGGTGAGAAATAAGAAAG               | 258                     |
| PCA3 RV            | TAGAAACGAGTAGAGGA                |                         |
| MUC1 FW            | TACCGATCGTAGCCCCTATG             | 199                     |
| MUC1 RV            | CTCACCAGCCCAAACAGG               |                         |
| TGM1 FW            | GGTGAACTCCCTGGATGACA             | 250                     |
| TGM1 RV            | AAGGGATGTGTCTGTGTCGT             |                         |
| TGM4 FW            | AAGATGGTGAATGGGCAGGA             | 199                     |
| TGM4 RV            | TGTGCTCCCTCTCAGAACTG             |                         |
| F13A1 FW           | TTGCTCAATACCTGGCCTCA             | 162                     |
| F13A1 RV           | TGTTGTGCTCTAGTCCTGGG             |                         |

**Supplementary Table 7. Tumour grade for patients recruited for gene expression analysis of TGM2\_v1 and TGM2\_v2.**

| <b>Biopsies from 57 patients accessed for gene expression study of TGM2 isoforms</b> |                               |              |
|--------------------------------------------------------------------------------------|-------------------------------|--------------|
| <b>Type and number of patients recruited</b>                                         | <b>Gleason score</b>          | <b>Grade</b> |
| 30 Chronic Idiopathic Prostatitis (CIP)                                              | N/A                           | N/A          |
| 27 Prostate adenocarcinoma (PAC)                                                     | Gleason 3+3 & 3+4 (n=9)       | 1+2          |
|                                                                                      | Gleason 4+3 (n=7)             | 3            |
|                                                                                      | Gleason 4+4, 4+5 & 5+5 (n=11) | 4+5          |

**Supplementary Table 8. Analysis of off-target deletion likely to be introduced by Cas9 via computational analysis.** List generated by computational analysis using the Zhang lab's tool. 20 nucleotide target sequences found similar to the sequence used to target exon 1 of TGM2 gene (CCCCGCCCGACCATGGCCGA) with possible mismatches on position (highlighted in red) of each sequence, corresponding scores and position of target sequence on the genomic locus.

| sequence                                                                              | score | mismatches                       | locus              |
|---------------------------------------------------------------------------------------|-------|----------------------------------|--------------------|
| CTT <b>G</b> 300A <b>G</b> ACCATG300GAAAG                                             | 1.3   | 4M <sub>s</sub> [ 2: 3: 4: 8]    | chr 12: +111468149 |
| CTCT <b>G</b> 000GA <b>A</b> CCATG <b>G</b> CTATGG                                    | 1.1   | 3M <sub>s</sub> [ 2: 4: 19]      | chr 1: -62625649   |
| <b>G</b> 0CT <b>G</b> CA <b>C</b> 0 <b>C</b> 0 <b>C</b> ATG300GAGAG                   | 0.9   | 4M <sub>s</sub> [ 1: 4: 7: 10]   | chr 15: +60681753  |
| 00 <b>C</b> A <b>C</b> 0 <b>C</b> 0 <b>C</b> 0 <b>C</b> ATG300GACAG                   | 0.9   | 4M <sub>s</sub> [ 4: 5: 7: 10]   | chr 6: -159565264  |
| 00 <b>C</b> A <b>G</b> 0 <b>C</b> T <b>G</b> CA <b>C</b> ATG300GACGG                  | 0.7   | 4M <sub>s</sub> [ 4: 8: 10: 11]  | chr 9: -128634486  |
| <b>C</b> A <b>C</b> 0 <b>C</b> T00 <b>C</b> G <b>T</b> 0 <b>C</b> ATG300 <b>G</b> TGG | 0.6   | 4M <sub>s</sub> [ 2: 5: 10: 20]  | chr 17: +73743911  |
| <b>A</b> G00 <b>C</b> T <b>C</b> T <b>A</b> CCATG300GACAG                             | 0.6   | 4M <sub>s</sub> [ 1: 2: 7: 9]    | chr 5: +95745244   |
| 0 <b>G</b> 00 <b>G</b> 0 <b>G</b> A <b>C</b> ACCATG300GATGG                           | 0.6   | 4M <sub>s</sub> [ 2: 7: 8: 9]    | chr X: -8169121    |
| <b>T</b> 00 <b>G</b> 0 <b>C</b> T <b>G</b> 0 <b>C</b> T <b>T</b> G300GATGG            | 0.5   | 4M <sub>s</sub> [ 1: 8: 10: 13]  | chr 10: +50043750  |
| 00 <b>C</b> T00 <b>C</b> T <b>G</b> 0 <b>C</b> ATG300 <b>G</b> T <b>A</b> AG          | 0.4   | 4M <sub>s</sub> [ 5: 9: 10: 20]  | chr 10: +110783053 |
| 0 <b>C</b> A <b>C</b> 000 <b>C</b> A00 <b>C</b> TG300GAAAG                            | 0.3   | 4M <sub>s</sub> [ 3: 5: 9: 13]   | chr 18: -7458939   |
| <b>A</b> 000 <b>C</b> T0 <b>G</b> 0 <b>C</b> ATG300 <b>A</b> AAGG                     | 0.3   | 4M <sub>s</sub> [ 1: 7: 10: 19]  | chr 8: +69292791   |
| 000 <b>C</b> A <b>C</b> T0 <b>G</b> 0 <b>C</b> ATG300 <b>T</b> AGGG                   | 0.3   | 4M <sub>s</sub> [ 5: 7: 10: 19]  | chr 21: +45539423  |
| 000 <b>A</b> 000 <b>C</b> A0 <b>C</b> ATG300 <b>C</b> ACAG                            | 0.3   | 4M <sub>s</sub> [ 4: 5: 9: 19]   | chr 15: +28539453  |
| 000 <b>C</b> T0 <b>C</b> A <b>C</b> 0 <b>C</b> ATG300 <b>C</b> AAAG                   | 0.3   | 4M <sub>s</sub> [ 5: 8: 9: 19]   | chr 10: +91464006  |
| 000 <b>C</b> A <b>C</b> 0 <b>G</b> A0 <b>C</b> ATG300 <b>C</b> ATGG                   | 0.3   | 4M <sub>s</sub> [ 5: 6: 8: 19]   | chr 21: +35526204  |
| 000 <b>C</b> A <b>G</b> 00 <b>C</b> T0 <b>C</b> ATG300 <b>C</b> ATGG                  | 0.3   | 4M <sub>s</sub> [ 4: 9: 10: 19]  | chr 7: +155080012  |
| 000 <b>C</b> T000 <b>A</b> 0 <b>C</b> ATG300 <b>T</b> AGGG                            | 0.3   | 4M <sub>s</sub> [ 5: 9: 10: 19]  | chr 8: -130531368  |
| <b>T</b> 0 <b>C</b> TG000GA00 <b>C</b> TG300 <b>G</b> AGAG                            | 0.3   | 4M <sub>s</sub> [ 1: 4: 13: 20]  | chr 17: +45981074  |
| <b>G</b> 000 <b>C</b> T <b>G</b> A00 <b>C</b> TG300 <b>C</b> AGG                      | 0.3   | 4M <sub>s</sub> [ 2: 8: 13: 20]  | chr 1: -43505168   |
| <b>G</b> 000 <b>G</b> 000 <b>G</b> 00 <b>C</b> TG300GACAG                             | 0.3   | 4M <sub>s</sub> [ 1: 10: 12: 13] | chr 6: -153505101  |
| 000 <b>A</b> 000 <b>G</b> 00 <b>C</b> T <b>T</b> G300 <b>G</b> T <b>A</b> AG          | 0.2   | 4M <sub>s</sub> [ 4: 10: 13: 20] | chr 1: -193533759  |
| <b>C</b> T000 <b>C</b> T <b>G</b> A0 <b>C</b> ATG300 <b>T</b> CAAG                    | 0.2   | 4M <sub>s</sub> [ 2: 8: 19: 20]  | chr 1: -62382764   |
| 0000 <b>G</b> A00 <b>C</b> A0 <b>C</b> ATG <b>C</b> A <b>G</b> AGAG                   | 0.2   | 3M <sub>s</sub> [ 6: 9: 18]      | chr 8: -53852890   |
| 0000 <b>G</b> 00 <b>G</b> 00 <b>C</b> 00 <b>C</b> TG300GATAG                          | 0.2   | 4M <sub>s</sub> [ 6: 7: 10: 13]  | chr X: -9293475    |
| 0000 <b>A</b> 000 <b>G</b> 00 <b>C</b> A0 <b>C</b> ATG300 <b>A</b> AAGG               | 0.2   | 4M <sub>s</sub> [ 6: 7: 8: 19]   | chr 16: -427311    |
| <b>C</b> T000 <b>C</b> T <b>G</b> A00 <b>C</b> T <b>T</b> G300 <b>C</b> AAAG          | 0.2   | 4M <sub>s</sub> [ 3: 8: 13: 19]  | chr 5: +136408413  |
| <b>C</b> A <b>C</b> A000 <b>C</b> T <b>A</b> 0 <b>C</b> ATG <b>C</b> T <b>G</b> ATGG  | 0.2   | 4M <sub>s</sub> [ 2: 4: 9: 18]   | chr 19: +36099793  |
| 000 <b>C</b> T00 <b>A</b> 00 <b>C</b> TG300 <b>A</b> AAGG                             | 0.2   | 4M <sub>s</sub> [ 5: 8: 13: 19]  | chr 19: +56338748  |
| 000 <b>C</b> A000 <b>C</b> A <b>G</b> 0 <b>C</b> TG300GAAAG                           | 0.2   | 4M <sub>s</sub> [ 5: 9: 11: 13]  | chr X: +16247885   |
| 000 <b>A</b> 000 <b>G</b> A0 <b>C</b> ATG300 <b>A</b> GACAG                           | 0.2   | 4M <sub>s</sub> [ 4: 6: 8: 18]   | chr 3: -129967548  |
| 000 <b>A</b> 000 <b>G</b> A0 <b>C</b> ATG300 <b>G</b> AAGG                            | 0.2   | 4M <sub>s</sub> [ 4: 6: 8: 18]   | chr 3: +129953809  |
| 000 <b>G</b> 00 <b>C</b> T <b>A</b> 0 <b>C</b> ATG300 <b>C</b> ACAG                   | 0.2   | 4M <sub>s</sub> [ 4: 6: 9: 19]   | chr 5: +117090159  |
| 000 <b>G</b> 000 <b>C</b> A <b>C</b> ATG300 <b>C</b> ATAG                             | 0.2   | 4M <sub>s</sub> [ 4: 9: 11: 19]  | chr 6: -14980560   |
| 0000 <b>C</b> 0 <b>C</b> T <b>G</b> 0 <b>C</b> ATG <b>A</b> 0 <b>C</b> ATGG           | 0.2   | 4M <sub>s</sub> [ 8: 10: 17: 19] | chr 20: -51798649  |
| 0000 <b>G</b> A0 <b>C</b> T <b>T</b> 0 <b>C</b> ATG300 <b>C</b> ACAG                  | 0.2   | 4M <sub>s</sub> [ 6: 9: 10: 19]  | chr X: -129195459  |
| 0000 <b>G</b> 00 <b>G</b> 0 <b>G</b> A0 <b>C</b> GTG300GAGGG                          | 0.2   | 4M <sub>s</sub> [ 6: 8: 12: 13]  | chr 20: -11603806  |
| 000 <b>G</b> A00 <b>C</b> A00 <b>C</b> A <b>G</b> G300GAGAG                           | 0.1   | 4M <sub>s</sub> [ 4: 5: 7: 14]   | chr 8: -132370185  |
| <b>C</b> T <b>C</b> A000 <b>C</b> A00 <b>C</b> A <b>G</b> G300GAGGG                   | 0.1   | 4M <sub>s</sub> [ 2: 4: 9: 14]   | chr 12: -127108506 |
| 0000 <b>C</b> 00 <b>C</b> T <b>G</b> 00 <b>C</b> TG300 <b>G</b> AGG                   | 0.1   | 4M <sub>s</sub> [ 9: 10: 13: 20] | chr 7: +130403085  |
| 00 <b>G</b> 0 <b>C</b> T00 <b>G</b> A <b>C</b> AT <b>C</b> 00 <b>G</b> A <b>C</b> AG  | 0.1   | 4M <sub>s</sub> [ 3: 6: 11: 15]  | chr 21: -38495057  |
| 00 <b>C</b> T <b>G</b> A0 <b>G</b> A00 <b>C</b> TG300 <b>C</b> AGGG                   | 0.1   | 4M <sub>s</sub> [ 4: 7: 13: 19]  | chr 2: -216536205  |
| 00 <b>C</b> T000 <b>G</b> A0 <b>C</b> ATG <b>C</b> T <b>G</b> CTAG                    | 0.1   | 4M <sub>s</sub> [ 4: 5: 18: 20]  | chr 5: +9702729    |
| 00 <b>C</b> T000 <b>C</b> A0 <b>C</b> ATG300 <b>C</b> ACTAG                           | 0.1   | 4M <sub>s</sub> [ 3: 9: 19: 20]  | chr 21: -38261573  |
| 000 <b>C</b> T00 <b>A</b> 00 <b>C</b> ATG <b>C</b> T <b>G</b> TAGG                    | 0.1   | 4M <sub>s</sub> [ 5: 8: 18: 20]  | chr 11: +47389410  |
| 000 <b>C</b> T000 <b>C</b> A0 <b>C</b> ATG300 <b>C</b> GTAG                           | 0.1   | 4M <sub>s</sub> [ 5: 9: 19: 20]  | chr 6: -71999834   |
| 0000 <b>C</b> 000 <b>C</b> A <b>G</b> C <b>A</b> G300GATGG                            | 0.1   | 3M <sub>s</sub> [ 9: 11: 14]     | chr 3: +100104277  |
| <b>T</b> 000 <b>G</b> 000 <b>C</b> A0 <b>C</b> ATG <b>G</b> C <b>A</b> ATGG           | 0.1   | 4M <sub>s</sub> [ 1: 9: 17: 19]  | chr 8: -98290785   |
| 000 <b>A</b> 00 <b>C</b> A00 <b>C</b> TG300GATAG                                      | 0.1   | 4M <sub>s</sub> [ 4: 8: 13: 18]  | chr 18: +13104013  |

**Supplementary Table 9. Differential regulation of genes in TG2KO PC3 cells compared to WT PC3 cells with a Benjamini-Hochberg p-value with trend toward significance.** Normal p-value was subjected to the (BH) correction test to exclude false discovery rate (BH p value of genes listed below fall between 0.0575 – 0.1).

| <b>Underexpressed genes - trend towards significance</b> |                                                 |                         |                           |                |                   |
|----------------------------------------------------------|-------------------------------------------------|-------------------------|---------------------------|----------------|-------------------|
| <b>HUGO Gene ID</b>                                      | <b>Gene name</b>                                | <b>Log2 fold change</b> | <b>Linear fold change</b> | <b>P-value</b> | <b>BH.p.value</b> |
| SLPI                                                     | Secretory leukocyte peptidase inhibitor         | -2.43                   | 0.185                     | 0.00286        | 0.0575            |
| BMP4                                                     | Bone morphogenetic protein 4                    | -1.69                   | 0.309                     | 0.00421        | 0.0606            |
| SMC3                                                     | Structural maintenance of chromosomes 3         | -0.451                  | 0.175                     | 0.00692        | 0.0705            |
| NOX5                                                     | NADPH oxidase, EF-hand calcium binding domain 5 | -2.51                   | 0.142                     | 0.01           | 0.0907            |
| EGLN2                                                    | Egl nine homolog 2                              | -0.367                  | 0.71                      | 0.00997        | 0.0907            |
| DES11                                                    | Desumoylating isopeptidase 1                    | -0.495                  | 0.731                     | 0.0122         | 0.0966            |
| SMAD9                                                    | SMAD family member 9                            | -2.81                   | 0.775                     | 0.0138         | 0.1               |

| <b>Overexpressed genes- trend towards significance</b> |                                                                        |                         |                           |                |                   |
|--------------------------------------------------------|------------------------------------------------------------------------|-------------------------|---------------------------|----------------|-------------------|
| <b>HUGO Gene ID</b>                                    | <b>Gene name</b>                                                       | <b>Log2 fold change</b> | <b>Linear fold change</b> | <b>P-value</b> | <b>BH.p.value</b> |
| SOD1                                                   | Superoxide dismutase 1, soluble                                        | 0.47                    | 1.39                      | 0.00324        | 0.0575            |
| CHP1                                                   | Calcineurin-like EF hand protein 1                                     | 0.516                   | 1.43                      | 0.00308        | 0.0575            |
| WWTR1                                                  | WW domain containing transcription regulator 1                         | 0.737                   | 1.67                      | 0.00299        | 0.0575            |
| TCF4                                                   | Transcription factor 4                                                 | 1.4                     | 2.64                      | 0.00329        | 0.0575            |
| GPR56                                                  | G protein-coupled receptor 56                                          | 2.12                    | 4.34                      | 0.00305        | 0.0575            |
| ETV4                                                   | Ets variant 4                                                          | 0.632                   | 1.55                      | 0.00403        | 0.0606            |
| LAMB3                                                  | Laminin, beta 3                                                        | 1.79                    | 3.45                      | 0.0038         | 0.0606            |
| IL1B                                                   | Interleukin 1, beta                                                    | 1.79                    | 3.46                      | 0.00419        | 0.0606            |
| SNAI2                                                  | Snail homolog 2                                                        | 1.27                    | 2.41                      | 0.00507        | 0.0653            |
| ALDOA                                                  | Aldolase A, fructose-bisphosphate                                      | 0.443                   | 1.36                      | 0.00628        | 0.0682            |
| VIM                                                    | Vimentin                                                               | 0.663                   | 1.58                      | 0.00561        | 0.0682            |
| TGFB1                                                  | Transforming growth factor, beta 1                                     | 0.667                   | 1.59                      | 0.00582        | 0.0682            |
| EP300                                                  | E1A binding protein p300                                               | 0.886                   | 1.85                      | 0.00552        | 0.0682            |
| SLC2A1                                                 | Solute carrier family 2 (facilitated glucose transporter), member 1    | 1.08                    | 2.11                      | 0.00614        | 0.0682            |
| LAMA5                                                  | Laminin, alpha 5                                                       | 1.04                    | 2.06                      | 0.00645        | 0.0685            |
| ID2                                                    | Inhibitor of DNA binding 2, dominant negative helix-loop-helix protein | 1.96                    | 3.88                      | 0.00726        | 0.0725            |
| MAP2K2                                                 | mMitogen-activated protein kinase kinase 2                             | 0.459                   | 1.37                      | 0.00764        | 0.0747            |
| PTK2                                                   | Protein tyrosine kinase 2                                              | 0.66                    | 1.58                      | 0.00902        | 0.0864            |
| BMPR2                                                  | Bone morphogenetic protein receptor, type II (serine/threonine kinase) | 0.595                   | 1.51                      | 0.00961        | 0.0904            |
| SP1                                                    | Sp1 transcription factor                                               | 0.538                   | 1.45                      | 0.0102         | 0.0909            |
| JUN                                                    | Jun proto-oncogene                                                     | 0.938                   | 1.92                      | 0.0104         | 0.0909            |
| FGFR4                                                  | fibroblast growth factor receptor 4                                    | 0.972                   | 1.96                      | 0.0117         | 0.0956            |
| ROCK1                                                  | Rho-associated, coiled-coil containing protein kinase 1                | 0.352                   | 1.28                      | 0.0122         | 0.0966            |
| F11R                                                   | F11 receptor                                                           | 1.06                    | 2.08                      | 0.0125         | 0.0967            |
| LOXL2                                                  | Lysyl oxidase-like 2                                                   | 1.21                    | 2.32                      | 0.0127         | 0.0967            |
| TWIST1                                                 | Twist homolog 1                                                        | 0.801                   | 1.74                      | 0.0131         | 0.0973            |
| VEGFB                                                  | Vascular endothelial growth factor B                                   | 0.9                     | 1.87                      | 0.0131         | 0.0973            |
| FN1                                                    | Fibronectin 1                                                          | 2.78                    | 6.87                      | 0.0162         | 0.109             |

## Supplementary Methods

### Cell culture conditions

Cells were cultured in humidified culture conditions with 5% CO<sub>2</sub>, 37°C. All cell lines used were tested for negative mycoplasma infection using EZ-PCR Mycoplasma test (Biological Industries, Israel). PCa cell lines were used between passage 10-40. Hypoxia was induced by modular incubator hypoxia chamber (Billups-Rothenberg Inc, San Diego, CA, USA) or chemically induced applying CoCl<sub>2</sub> (100-150 μM). PC3 cells were cultured in DMEM F-12 (Dulbecco's Modified Eagle Medium: Nutrient Mixture F-12) supplemented with 10% FBS (BioWest, Nuaille, France) and 1% Penicillin-Streptomycin. DU145 cells in EMEM supplemented with 10% FBS, 1% Penicillin-Streptomycin, 1% Non-essential amino acids. LNCaP in RPMI-1640 with 10% FBS, 1% Penicillin-Streptomycin and 1% Sodium pyruvate. PC346-Flu1 and PC346-Flu2 were cultured in DMEM-F12 supplemented with 0.001% BSA (Sigma-Aldrich, St. Louis, MO, USA), 2% DCC, 10 ng/mL EGF (Sigma-Aldrich), 1% Insulin-Transferrin-Selenium (Gibco, Waltham, MA, USA), 0.5 μg/mL hydrocortisone (Sigma-Aldrich), 0.6 ng/mL triiodothyronine (Sigma-Aldrich), 0.1 mM phosphoethanolamine (Sigma-Aldrich), 50 ng/mL cholera toxin (Sigma-Aldrich), 100 ng/mL fibronectin (Sigma-Aldrich), 20 μg/mL Fetuin (ICN Biomedicals Inc., Costa Mesa, CA, USA) and 1 μM hydroxyflutamide (Sigma-Aldrich). All growth media were commercially obtained from Lonza (Manchester, UK).

### Quantitative PCR (qRT-PCR)

Total RNA was isolated using the GenElute™ Mammalian total RNA miniprep kit (Sigma-Aldrich) and reverse transcribed (2 μg) with random primers (Promega UK, Chilworth, UK) using Superscript® II Reverse Transcriptase (Invitrogen, Waltham, MA, USA). cDNA was amplified by qPCR using iQSYBR Green Supermix (Bio-Rad, Hercules, CA, USA), with oligonucleotide primer pairs listed in Supplementary Table 6, as previously described (9). Relative quantifications were performed by the  $2^{-\Delta\Delta C_t}$  according to (2) with HPRT-1 or TBP as housekeeping gene.

### Screening of TG2 transcripts in patients' biopsies

Male patients (mean age: 65.1 ± 6.3 years), who had undergone transrectal ultrasound-guided needle biopsy at the Urology Department of the Policlinic University Hospital (Messina, Italy)

were recruited for this study (n=101). Prostate cancer biopsy tissues were collected, processed, and classified (for classification see Supplementary Table 7) by Marta Rossanese as previously described (10). The study was approved by the Research Ethics Committee of Polyclinic Hospital University in Messina (approval number 37/17, date 2017/05/10), and carried out in accordance with Helsinki declaration ethical principles. Informed written consent was obtained from all participants.

Total RNA was isolated from prostate biopsies using the TRIzol reagent (ThermoFisher Scientific, Monza, Italy), and reverse transcribed using High-Capacity cDNA Archive Kit (ThermoFisher Scientific). TGM2\_v1, TGM2\_v2, Prostate Cancer Antigen (PCA3), and Keratin 13 (KRT13) transcripts, the latter two as markers of tumour and epithelial cells, respectively (10,11), were amplified (Supplementary Table 6) by SYBR Green-based Real-time qRT-PCR. PCA3<sup>-</sup> biopsies were excluded from the PRAD group as not representative of tumour samples, in order to decrease the chances of false positives. Similarly, PCA3<sup>+</sup> biopsies were excluded from CIP group as representative of benign prostatic hyperplasia (BPH) instead of CIP. Power analysis was performed to determine the sample size using previously published data (power 80%, alpha 0.05) (6).

Real-Time qRT-PCR was performed in a 7900HT Fast Real-Time PCR System and data were collected with SDS 2.3 software (Applied Biosystems, Foster City, CA). The  $2^{-\Delta Ct}$  method was used for assessing the levels of mRNA transcripts.  $\beta$ -actin (B-ACT) was used as housekeeping gene. The respective amounts of PCA3  $2^{-\Delta Ct}$  were used to normalise the expression levels of TGM2\_v1 and TGM2\_v2, calculated as  $2^{-\Delta Ct}$ , in PRAD samples (11). Differential expression levels were then expressed as fold change of normalised  $2^{-\Delta Ct TGM2}$  values of PRAD compared to the average  $2^{-\Delta Ct TGM2}$  of all CIP samples.

### **Immunofluorescence staining**

TG2 immunostaining was performed, and specimens viewed by confocal microscopy as previously described (12), with the exception that cells were fixed and permeabilised 90% methanol in PBS (v/v) at  $-20^{\circ}\text{C}$  for 10 min.

### **Immunoblotting of cell lysates**

Cell lysates were prepared in sucrose lysis buffer (0.25M sucrose, 2mM EDTA and 5mM Tris-HCl) as previously described in(12). Equal protein amount was resolved by SDS-PAGE, 12% (w/v) acrylamide reducing and denaturing conditions, blotted using standard procedures and detected via primary antibody and secondary HRP-conjugated antibody by enhanced chemiluminescence (EZ-chemiluminescent Kit, Biological Industries) as previously described (13).

### **Cell proliferation, migration and adhesion**

PCa cells ( $3 \times 10^3$  cells/well of 96well plate) were transferred into the IncuCyte S3 live cell imaging system for image acquisition every 2 hours (Essen Bioscience–Sartorius UK, Epsen, UK). Proliferation was expressed as percentage of phase area confluence normalised to time 0h. Migration was monitored by a scratch assay in real time PCa cells (40,000 cells/well) were seeded in wells of ImageLock 96well plate (Essen Bioscience) and allowed to form a monolayer. A 96 pin WoundMaker® was used to create a wound in the monolayer of cells. followed by image acquisition every 2 hours. Migration was expressed as relative wound density, i.e. the ratio of the occupied area to the total area of the original scratch area. Cell adhesion on fibronectin was performed as described (4) in serum starved cells (growth media containing 0.1% FBS).

### **Measurement of TG activity**

Total TG activity was measured through incorporation of biotinylated cadaverine into fibronectin as previously described (14). In situ TG activity was measured through incorporation of FITC-cadaverine (0.5 mM) in live cells as previously described (4).

### **Expression constructs and cell transfections**

PCa cells were transfected by electroporation using the Nucleofector® Kit V (Lonza) following manufacturer's instruction. pcDNA3.1(+)-ValTG2 was a kind gift from Prof Fesus Laszlo and Róbert Király, University of Debrecen. Recombinant human TGM2\_v1 was expressed and purified as previously described (1); the cDNA of recombinant human TGM2\_v2 was subcloned from the Gateway PLUS shuttle GC-Z2235 (GeneCopoeia) into the pET21a(+)



plasmid (Novagen) between *NheI* and *HindIII* restriction enzyme sites. TGM2\_v2 protein expression was induced in BL21 (DE3) cells (Novagen) as described (1). TGM2\_v2 was also subcloned in pcDNA3.1/Hygro(-) via the *NheI* and *HindIII* restriction enzyme site (pcDNA3.1/Hygro(-)TGM2\_v2). Lipofectamine 3000 (Invitrogen) was used for the siRNA knockdown targeting the Androgen Receptor.

### **Antibodies and Reagents**

Primary antibodies: mouse monoclonal anti-TG2 (CUB7402) (MA5-12739, Invitrogen); rabbit polyclonal anti- $\beta$ -tubulin (Ab6046), mouse monoclonal anti CD63 (ab193349) and rabbit monoclonal anti-MUC1 (ab109185) (Abcam, Cambridge, UK); mouse monoclonal anti HIF-1 $\alpha$  (MAB1536, Bio-Techne, UK); rabbit polyclonal anti-ALIX (pab0204, Covalab, France); mouse monoclonal anti Flotillin-2 (BD Biosciences, Wokingham, UK); mouse monoclonal anti-TOM20 (Santa Cruz Biotechnology, Dallas, TX, USA). Custom made rabbit antibody anti-TGM2\_v2 was raised against the unique epitope SG<sup>539</sup>KALCSWSIC<sup>548</sup> (exon 10b) (9); the immunogen was the N-terminal acetylated peptide in conjugation with KLH (Keyhole Limpet Hemocyanin) (GenScript, USA). Secondary antibodies: polyclonal IgG-HRP conjugated antibodies (Dako, Denmark); mouse IgG FITC conjugated antibodies (Sigma-Aldrich). Reagents: purified guinea pig TG2 (Sigma-Aldrich); G418 (Gibco); electroporation transfection kit V (Lonza); ZDON (Zedira, Darmstadt, Germany) used at IC<sub>50</sub> 90 $\mu$ M; siRNA directed towards the androgen receptor (ThermoFisher Scientific, UK).

### **Immunoprecipitations**

Immunoprecipitations from cell lysates were carried out by using the Pierce Crosslink Magnetic IP/Co-IP Kit (Thermo Scientific) as previously described (3).

### **Genotyping approach**

Genomic DNA was extracted from the transfected cell lines by using the Qamp DNA mini kit (Qiagen, UK) according to manufacturers' instructions. The gene editing events in TGM2 exon 1 leading to reading frame disruption were detected by Sanger sequencing of PCR products amplified with primers flanking the targeted exon fragment, with the following primer pair:

Forward 5'-CCAGTGGTCGCACTTGGAGGG-3'

Reverse 5'-CCTGGCGGACCACTGGCACGT -3'

### **Spheroid Formation Assay**

DU145 WT and TG2KO clones were cultured to ~80% confluency in T75 flasks, collected, counted and seeded into an ultra-low attachment 96-well plate (BRAND, USA) at 4,000 cells/well seeding density in complete EMEM medium. The plate was then centrifuged at 130 x g for 15 minutes and inserted into the IncuCyte® S3 live-cell analysis system. Images were taken at 6-hour intervals at 10x magnification for 16 days. Throughout the experimental duration no media change occurred.

### **Nuclear fractionation**

Nuclear fractionation of PC3 cells was performed according to manufacturer's instructions using NE-PER Nuclear and Cytoplasmic Extraction Reagents (Thermo Scientific).

### **Prostate tissue microarray immunostaining**

A FFPE prostate cancer tissue microarray (TMA, TissueArray.com) was deparaffinized using a series of washes, including three washes of 5 min each in xylene (534056, Sigma-Aldrich), followed by two washes in 100% ethanol (1009832511, Sigma-Aldrich), and two washes in 95% ethanol. The slide was then rehydrated in double distilled water and immediately subjected to antigen retrieval using 1X citrate buffer (C9999, Sigma-Aldrich) in a pre-heated pressure cooker for 15 min. The TMA was washed with 1X tris-buffered saline containing 0.1% Tween20 (TBS-T) for 5 min and blocked using 200µL of Buffer-W (11238417232, NanoString) for 1 h at room temperature in a humidity chamber. Mouse anti-TG2 (CUB7402, 1:100) and rabbit anti-TGM2\_v2 (1:100) antibodies were then added to the tissues and incubated for 1 h at room temperature in a humidity chamber, followed by three washes (10 min each) with 1X TBS-T. The secondary antibodies (Alexa Fluor® 647 Goat Anti Mouse IgG H&L, 1:100, Abcam; Alexa Fluor® 594 Goat Anti rabbit IgG H&L, 1:100, Abcam) were prepared in Buffer-W and incubated in a humidity chamber protected from light for 1 h. The slide was washed three times (10 min each) with 1X TBS-T and nuclear staining of the tissues was performed with Syto13 (400nM, ThermoFisher Scientific) for 15 min at room temperature.

Excess Syto13 stain was removed with one 1X TBS wash and the TMA imaged using the NanoString GeoMx Digital Spatial profiling platform. Fluorescence intensities were measured with ImageJ Fiji software. Normal Adjacent Tissues (NAT) presenting cystic dilatation were exclude from the analysis.

## Supplementary References

1. Lortat-Jacob H, Burhan I, Scarpellini A, Thomas A, Imberty A, Vivès RR, et al. Transglutaminase-2 Interaction with Heparin. *Journal of Biological Chemistry*. 2012 May;287(22):18005–17.
2. Livak KJ, Schmittgen TD. Analysis of Relative Gene Expression Data Using Real-Time Quantitative PCR and the  $2^{-\Delta\Delta CT}$  Method. *Methods*. 2001 Dec;25(4):402–8.
3. Burhan I, Furini G, Lortat-Jacob H, Atobatele AG, Scarpellini A, Schroeder N, et al. Interplay between transglutaminases and heparan sulphate in progressive renal scarring. *Sci Rep*. 2016 Oct 3;6(1):31343.
4. Scarpellini A, Germack R, Lortat-Jacob H, Muramatsu T, Billett E, Johnson T, et al. Heparan Sulfate Proteoglycans Are Receptors for the Cell-surface Trafficking and Biological Activity of Transglutaminase-2. *Journal of Biological Chemistry*. 2009 Jul;284(27):18411–23.
5. Glinsky G V., Glinskii AB, Stephenson AJ, Hoffman RM, Gerald WL. Gene expression profiling predicts clinical outcome of prostate cancer. *Journal of Clinical Investigation*. 2004 Mar 15;113(6):913–23.
6. Grasso CS, Wu YM, Robinson DR, Cao X, Dhanasekaran SM, Khan AP, et al. The mutational landscape of lethal castration-resistant prostate cancer. *Nature*. 2012 Jul 20;487(7406):239–43.
7. Taylor BS, Schultz N, Hieronymus H, Gopalan A, Xiao Y, Carver BS, et al. Integrative Genomic Profiling of Human Prostate Cancer. *Cancer Cell*. 2010 Jul;18(1):11–22.
8. Lapointe J, Li C, Higgins JP, van de Rijn M, Bair E, Montgomery K, et al. Gene expression profiling identifies clinically relevant subtypes of prostate cancer. *Proceedings of the National Academy of Sciences*. 2004 Jan 20;101(3):811–6.
9. Phatak VM, Croft SM, Rameshaiah Setty SG, Scarpellini A, Hughes DC, Rees R, et al. Expression of transglutaminase-2 isoforms in normal human tissues and cancer cell lines: dysregulation of alternative splicing in cancer. *Amino Acids*. 2013 Jan 17;44(1):33–44.
10. Guttilla A, Zazzara M, Zattoni F, Novara G, Zanin M, Gardiman M, et al. Histopathological characteristics of microfocal prostate cancer detected during systematic prostate biopsy. *BJU Int*. 2015 Aug;116(2):202–6.
11. Cannata A, De Luca C, Korkina LG, Ferlazzo N, Ientile R, Currò M, et al. The SNP rs2298383 Reduces ADORA2A Gene Transcription and Positively Associates with Cytokine Production by Peripheral Blood Mononuclear Cells in Patients with Multiple Chemical Sensitivity. *Int J Mol Sci*. 2020 Mar 9;21(5):1858.
12. Furini G, Schroeder N, Huang L, Boocock D, Scarpellini A, Coveney C, et al. Proteomic Profiling Reveals the Transglutaminase-2 Externalization Pathway in Kidneys after

Unilateral Ureteric Obstruction. *Journal of the American Society of Nephrology*. 2018 Mar;29(3):880–905.

13. Tonoli E, Verduci I, Gabrielli M, Prada I, Forcaia G, Coveney C, et al. Extracellular transglutaminase-2, nude or associated with astrocytic extracellular vesicles, modulates neuronal calcium homeostasis. *Prog Neurobiol*. 2022 Sep;216:102313.
14. Jones RA, Nicholas B, Mian S, Davies PJ, Griffin M. Reduced expression of tissue transglutaminase in a human endothelial cell line leads to changes in cell spreading, cell adhesion and reduced polymerisation of fibronectin. *J Cell Sci*. 1997 Oct 1;110(19):2461–72.
