# Supplementary material for: Canonical and truncated transglutaminase-2 regulate mucin-1 expression and androgen independency in prostate cancer cell lines
Source: Springer Nature journal article supplement (doi:10.1038/s41419-023-05818-9), 2023-05-09
Supplement: MOESM5 [file 41419_2023_5818_MOESM5_ESM.pdf]

Figure 1A

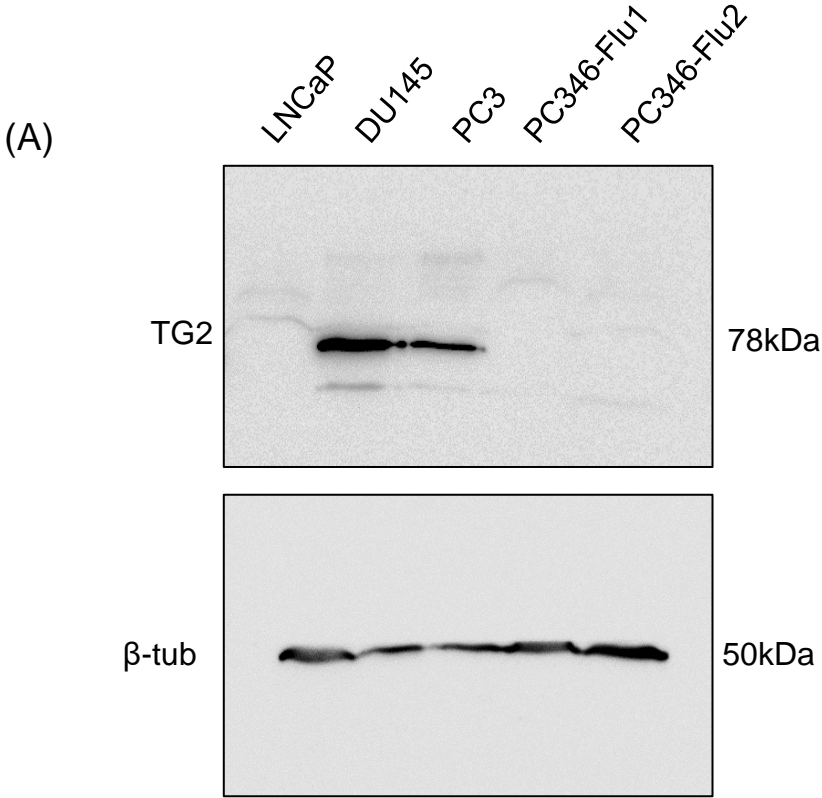

Figure 1B

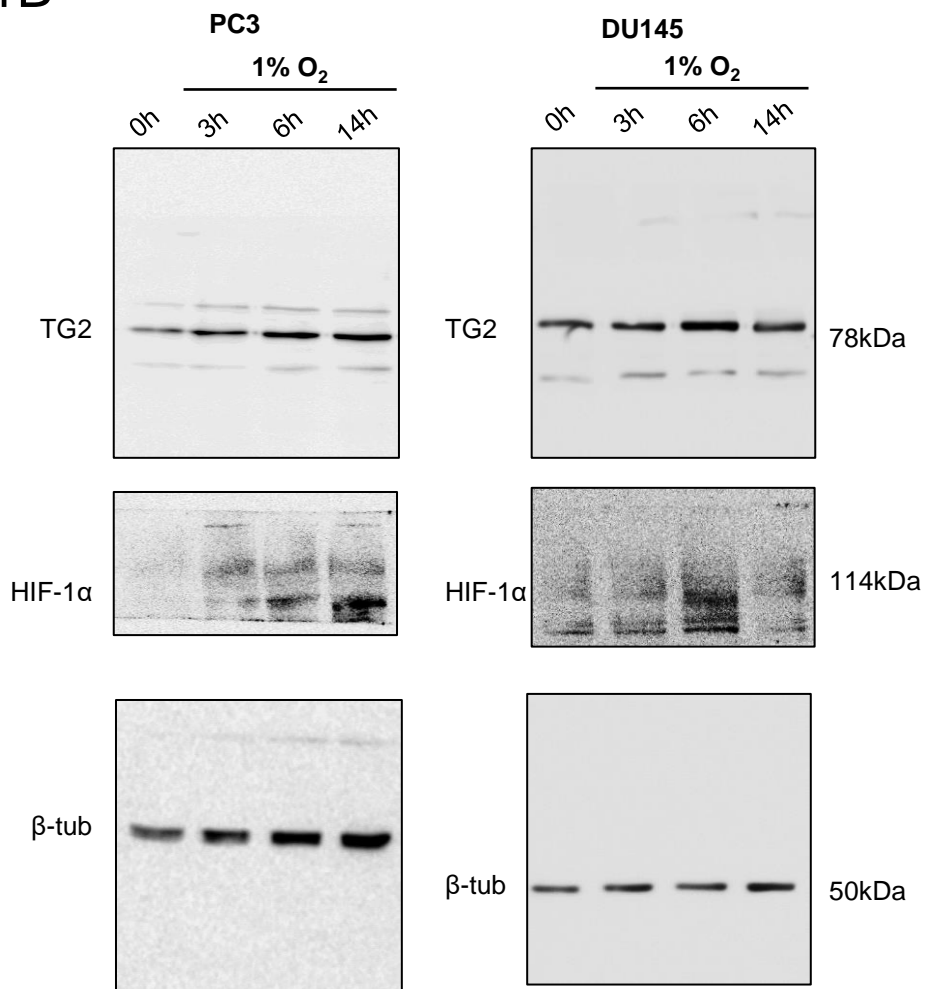

Figure 1C

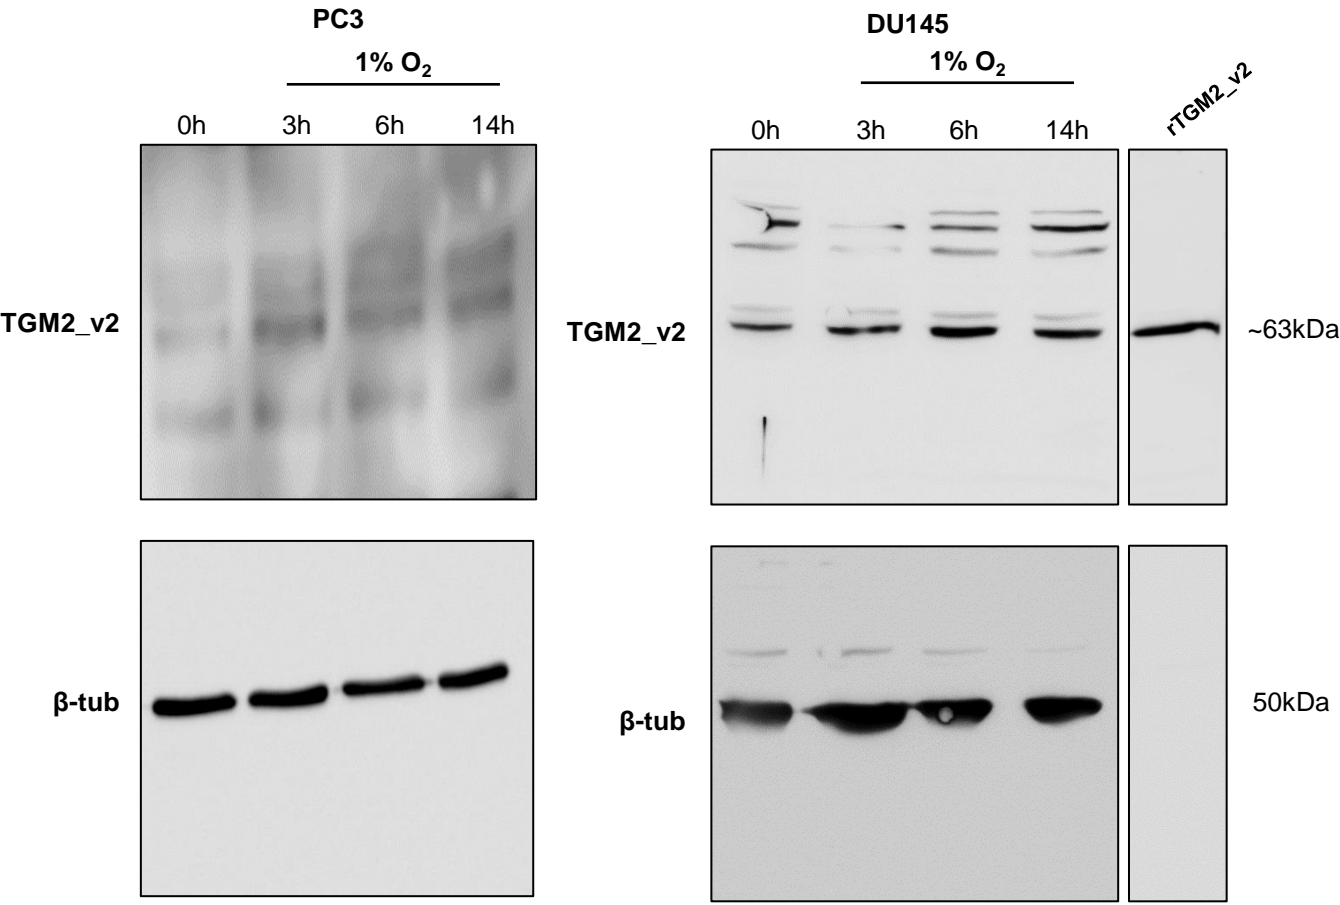

# Figure 1D

Density (g/ml) 1.066 1.074 1.082 1.108 1.152 1.162 1.226 1.254

TL F1 F2 F3 F4 F5 F6 F7 F8

**TG2**

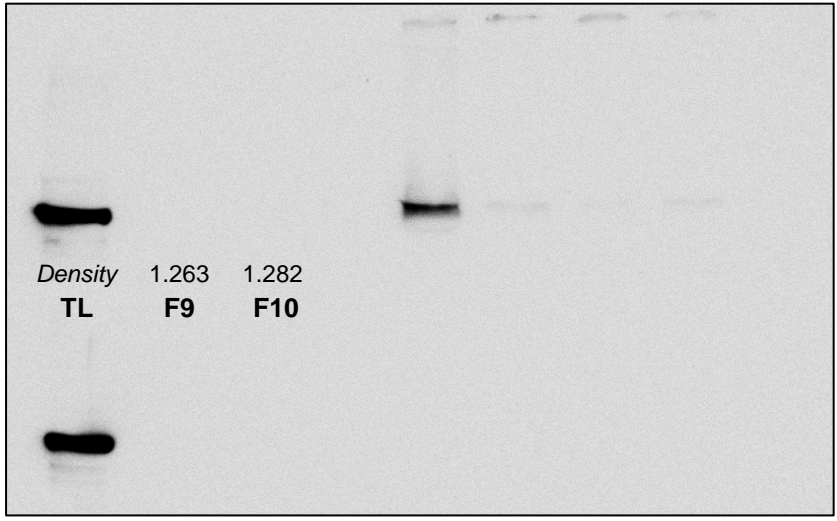

**CD63**

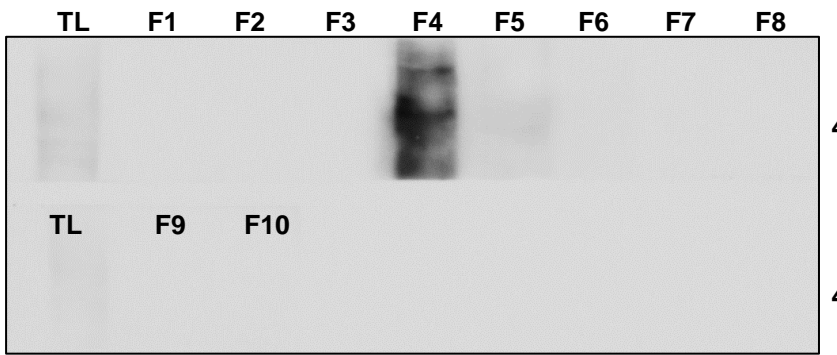

**Alix**

Stripping and re-probing of TG2 blot

TL: long exposition

EVs fractions: short exposition

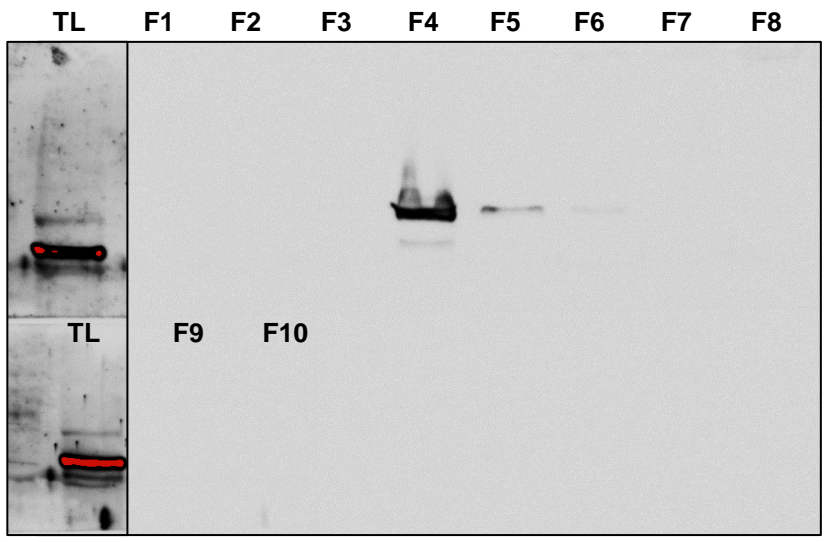

**FLOT-2**

Stripping and re-probing of CD63 blot

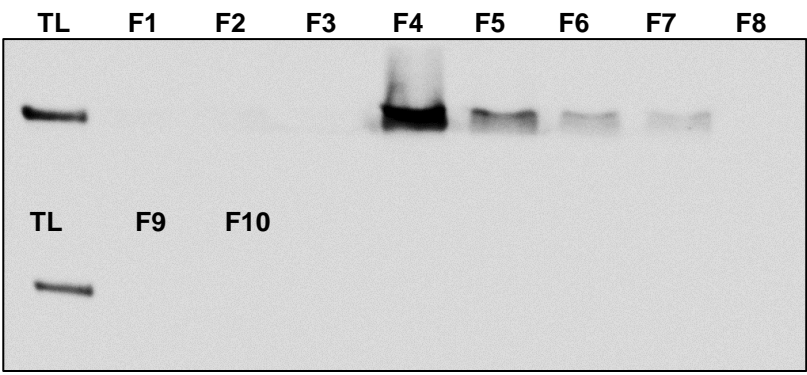

Figure 1G

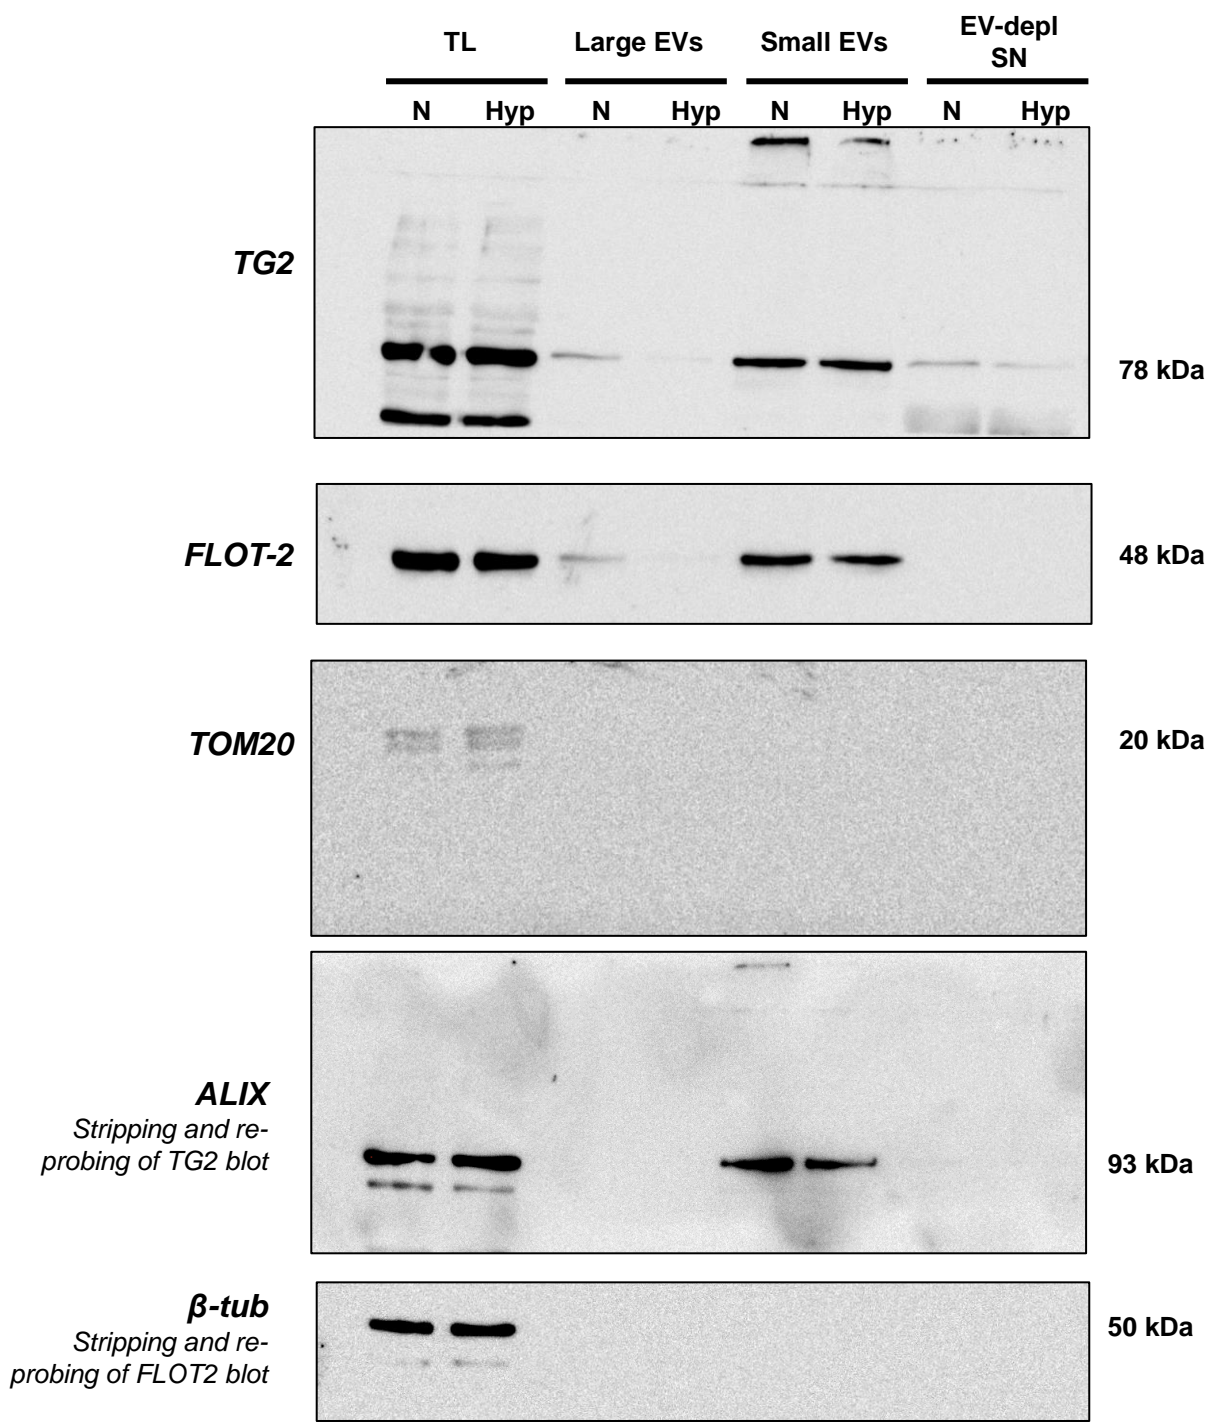

Figure 4A

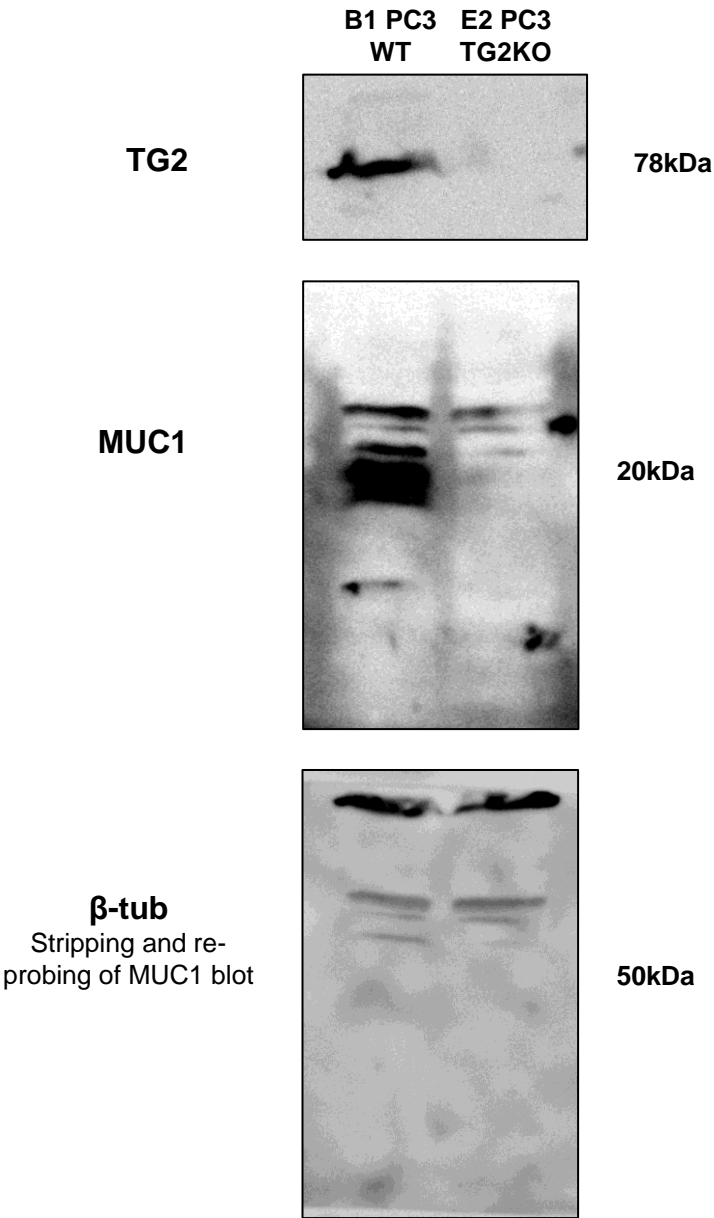

Figure 4B

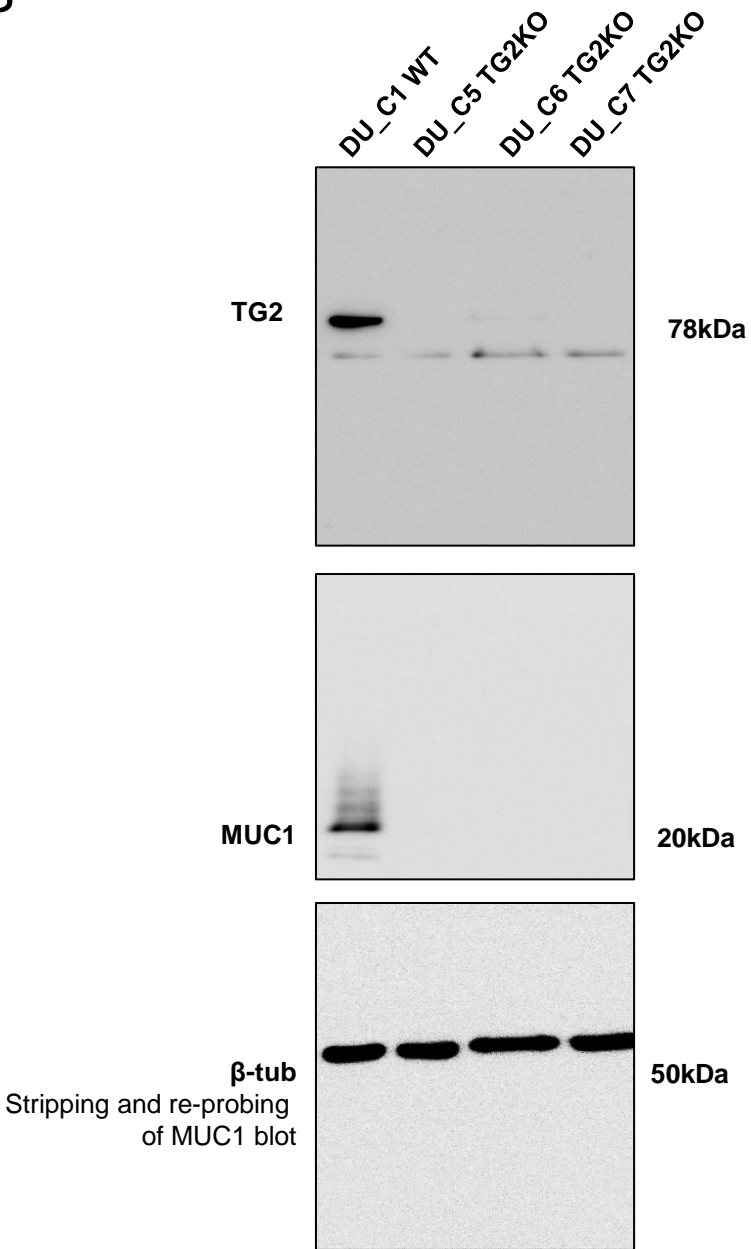

# Figure 4G

(I)

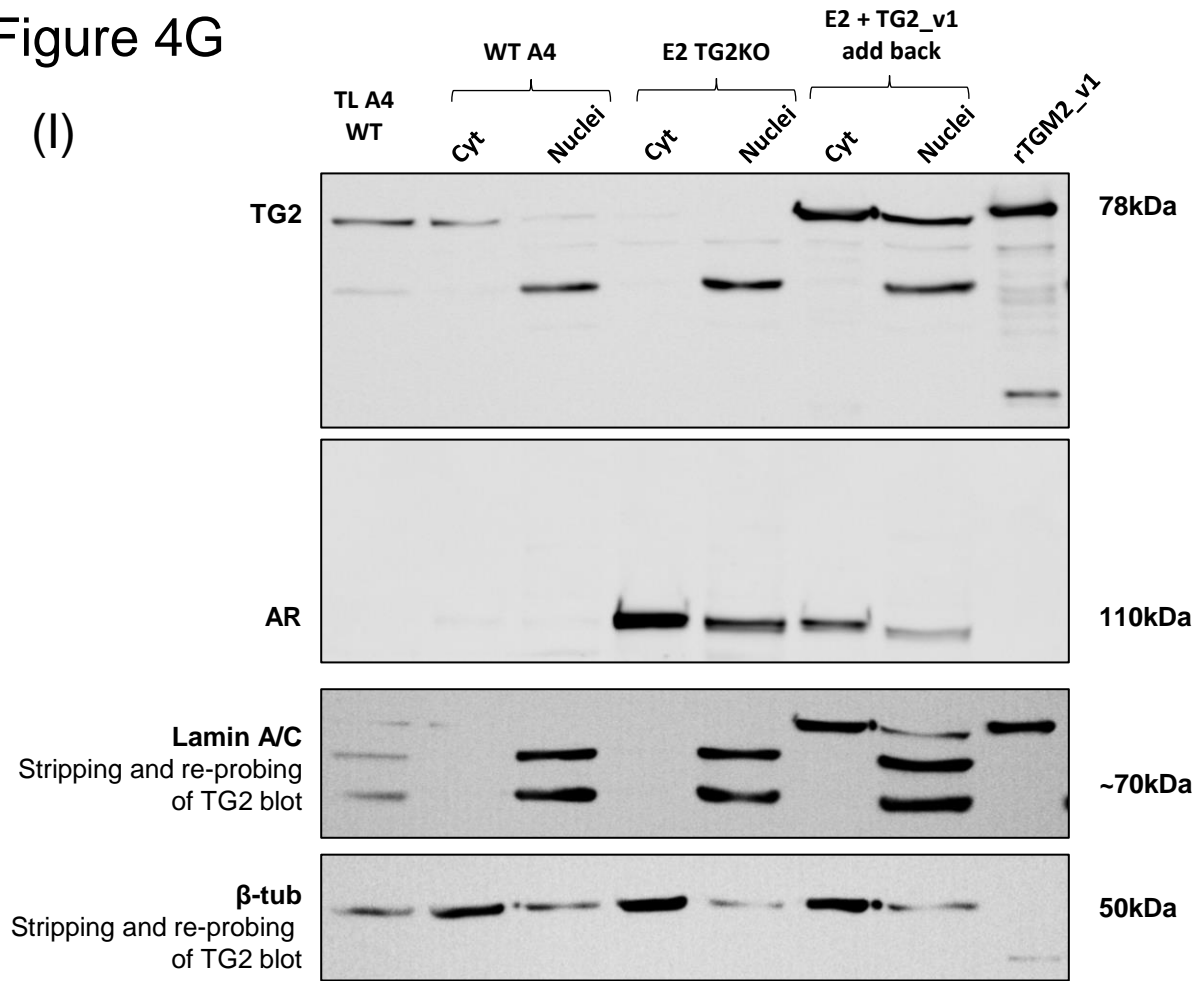

(II)

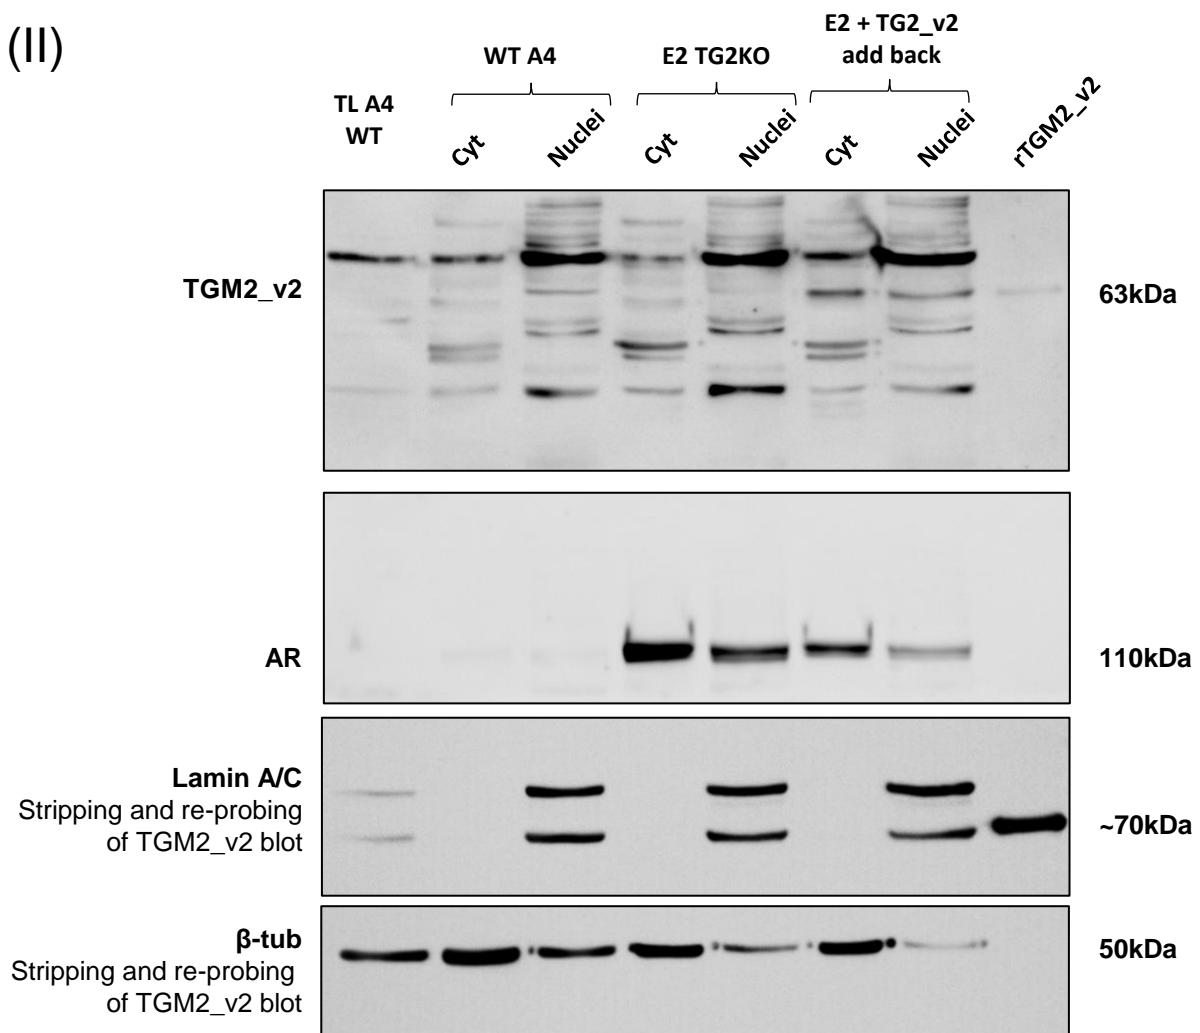



# Supplementary Figure 1

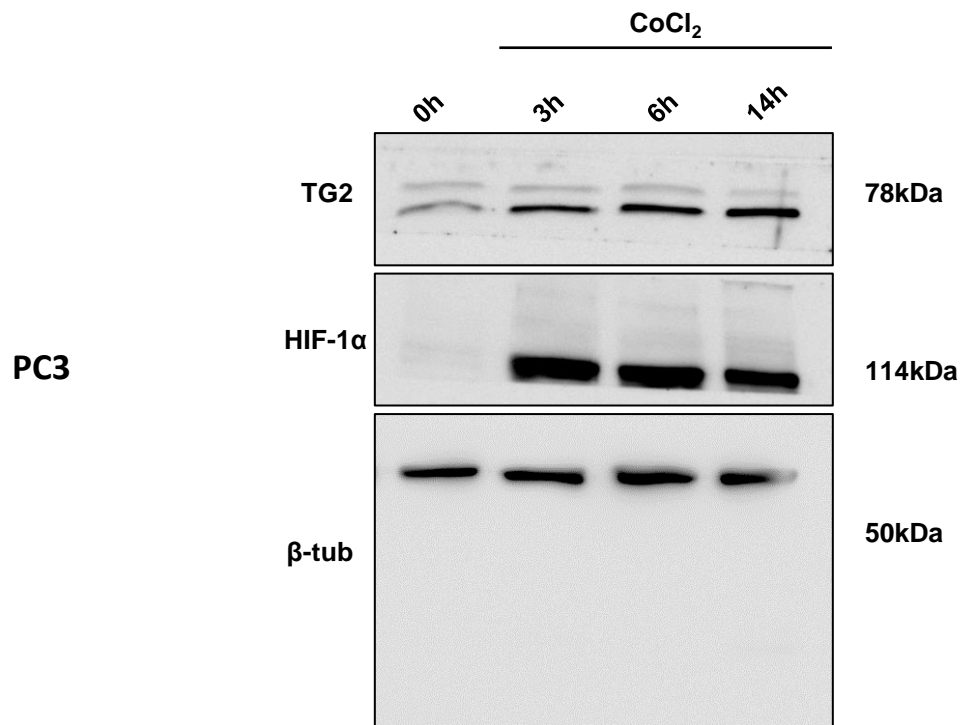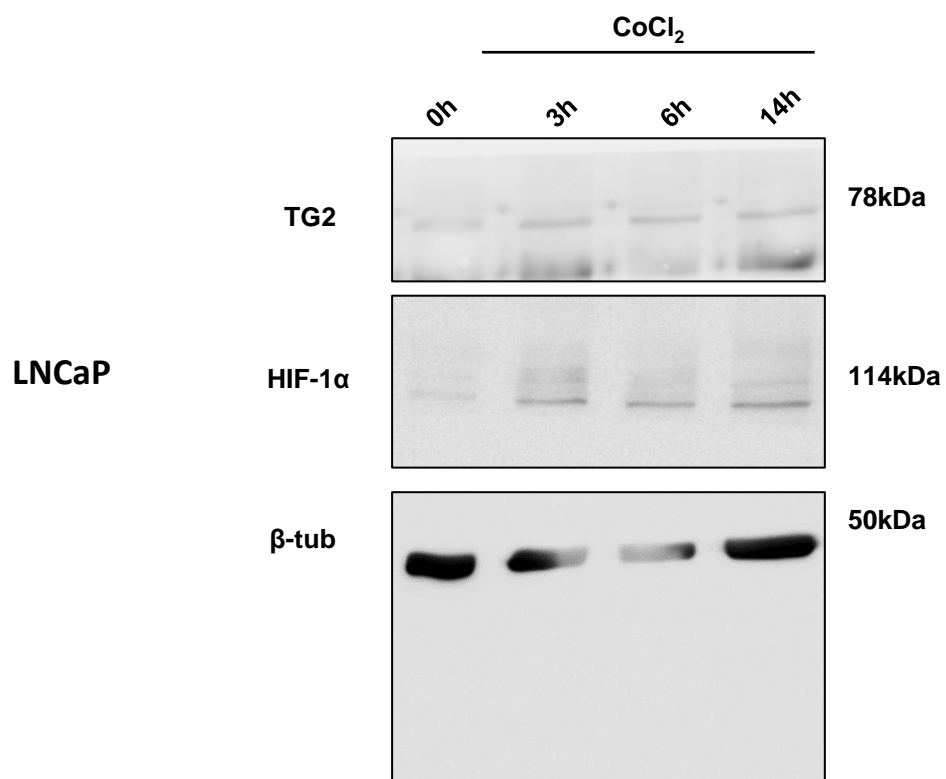

# Supplementary Figure 2

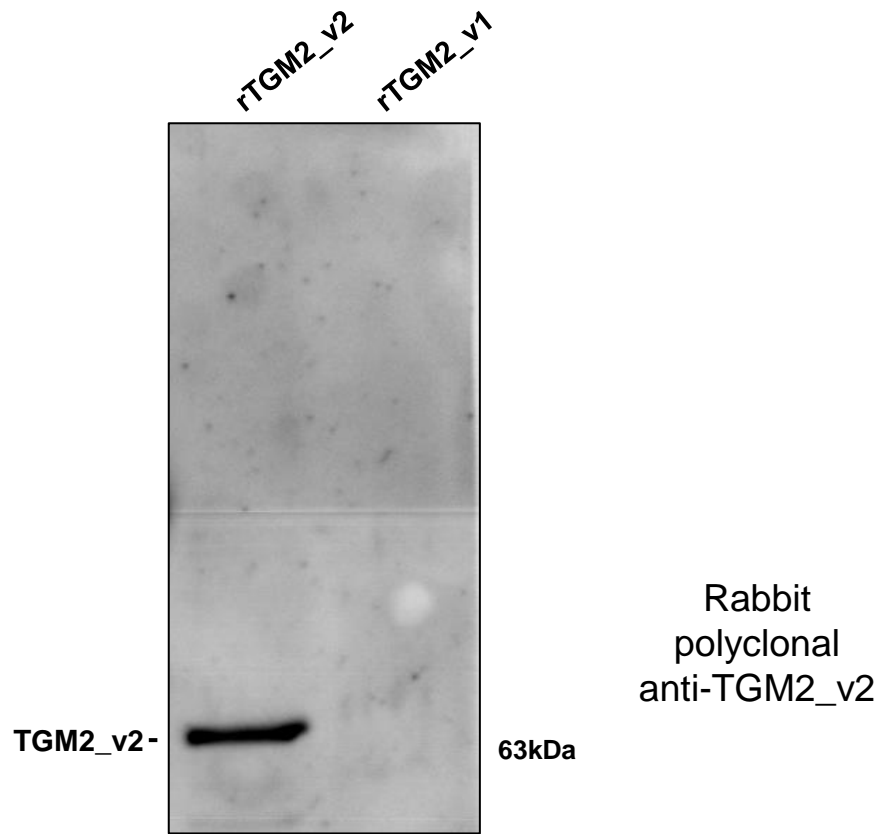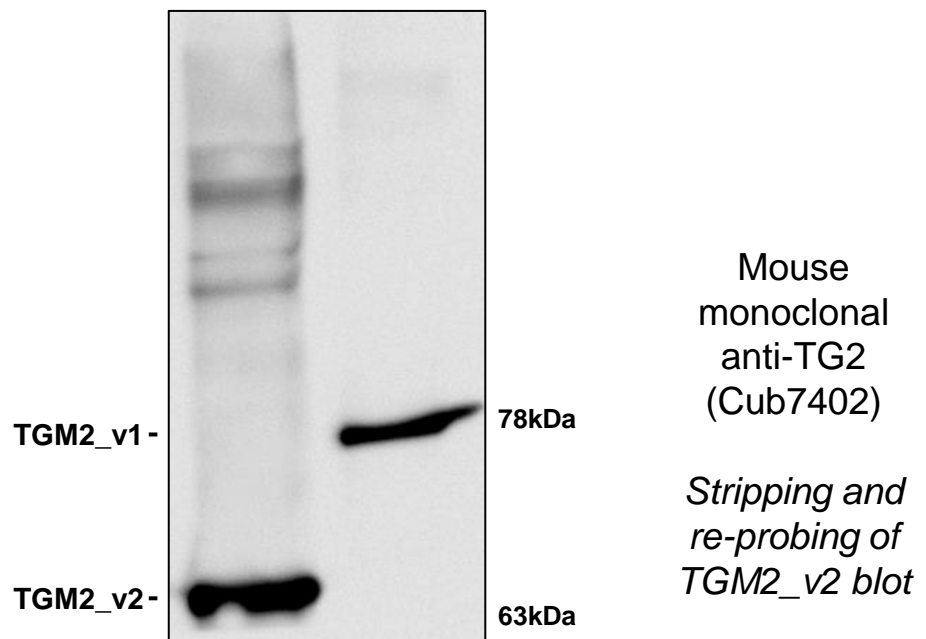

# Supplementary Figure 3

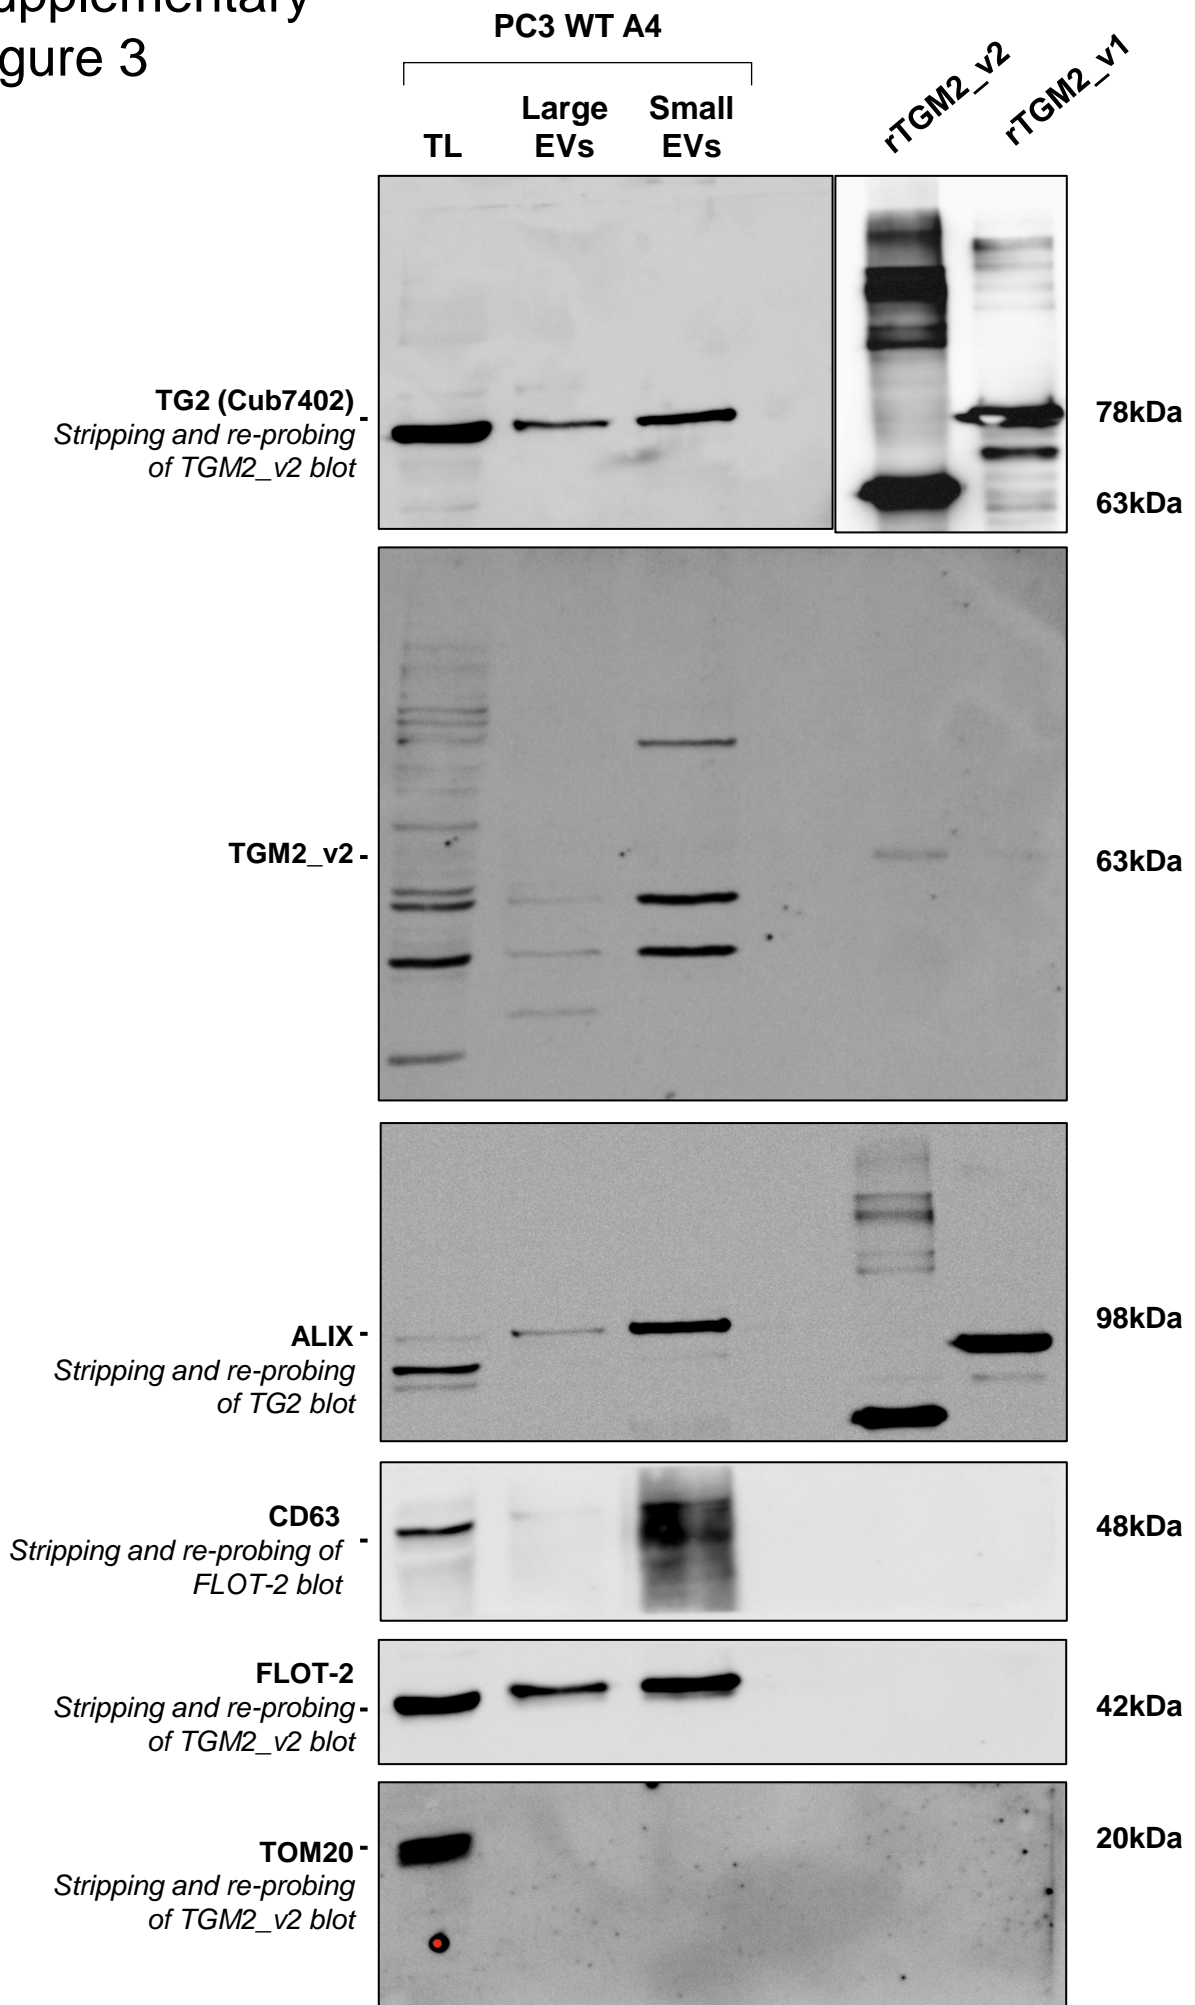

# Supplementary Figure 5A

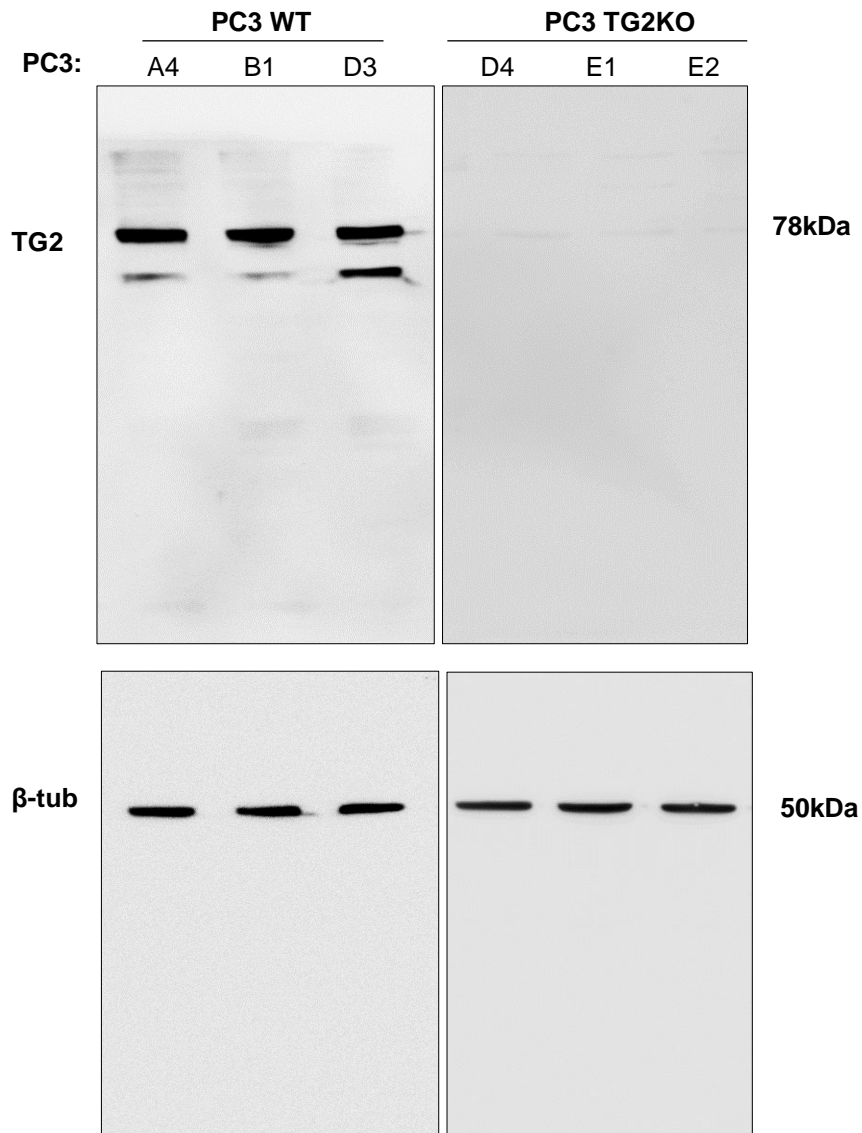

# Supplementary Figure 5B

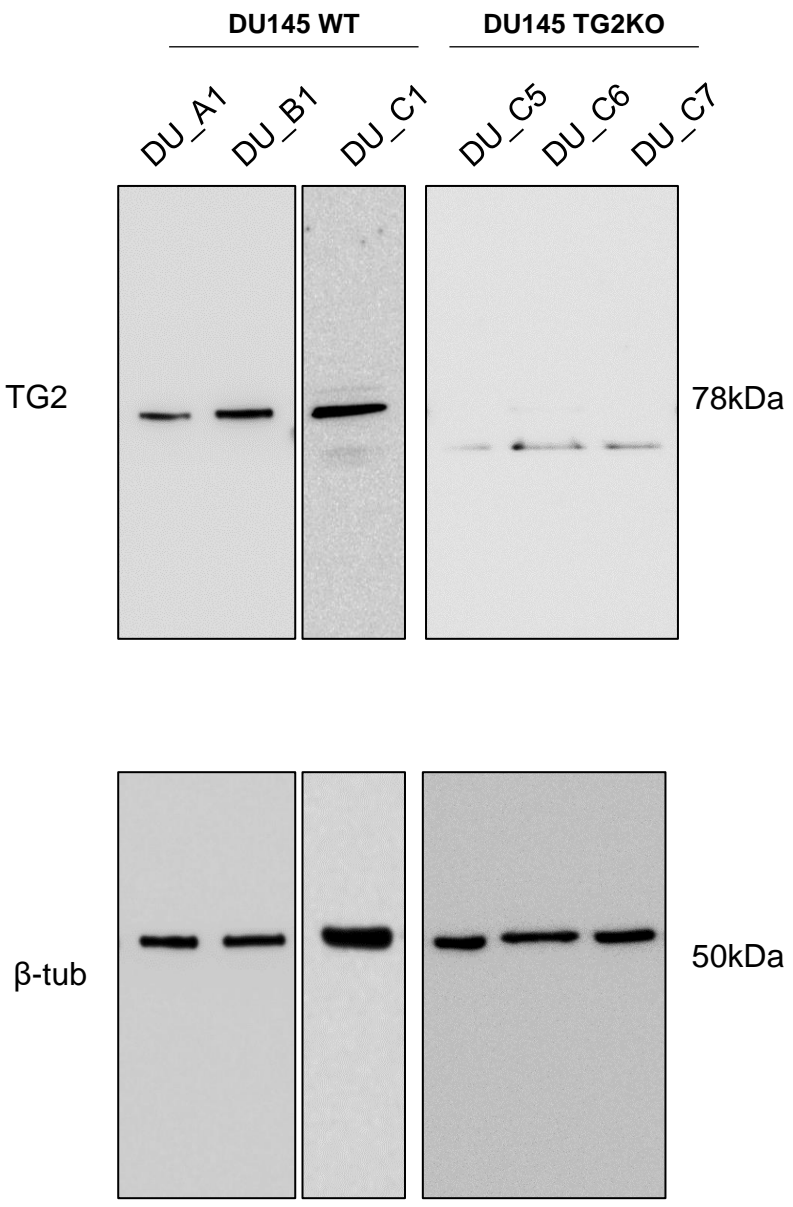

# Supplementary Figure 8

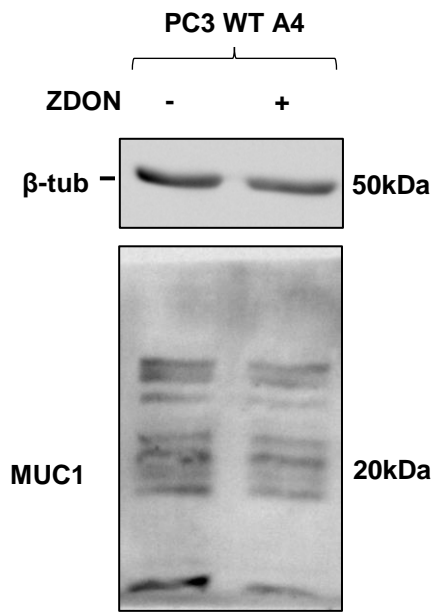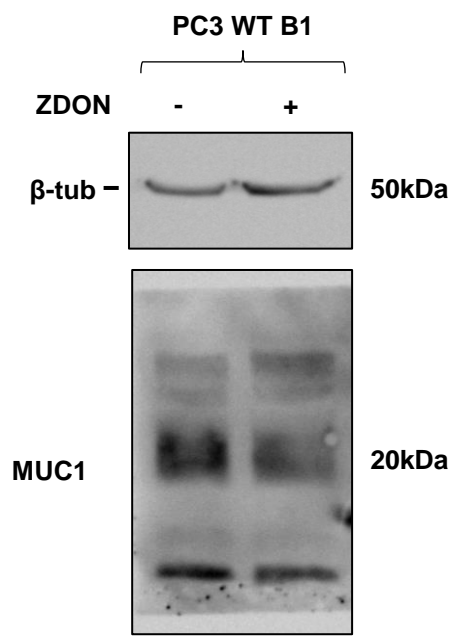

# Supplementary Figure 9A

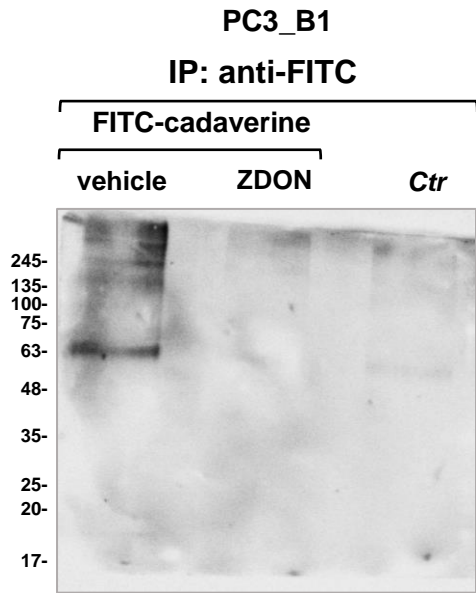

**WB: anti-MUC1**

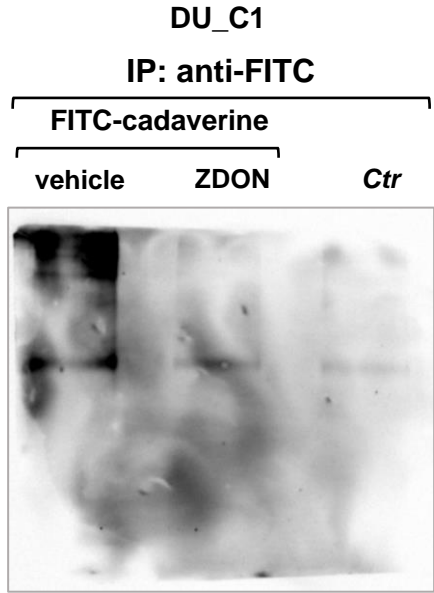

**WB: anti-MUC1**
